# Supplementary material
Source: PubMed Central journal article supplement (PMC4178601)
Supplement: AEM.01491-14_zam999105635so1.pdf [file AEM.01491-14_zam999105635so1.pdf]

Supplementary Figure 1

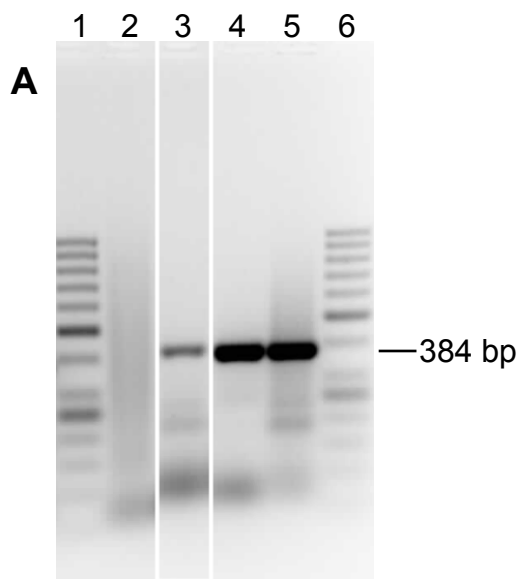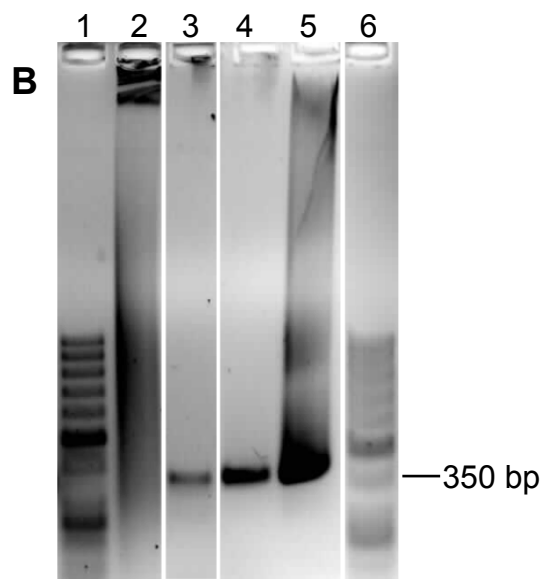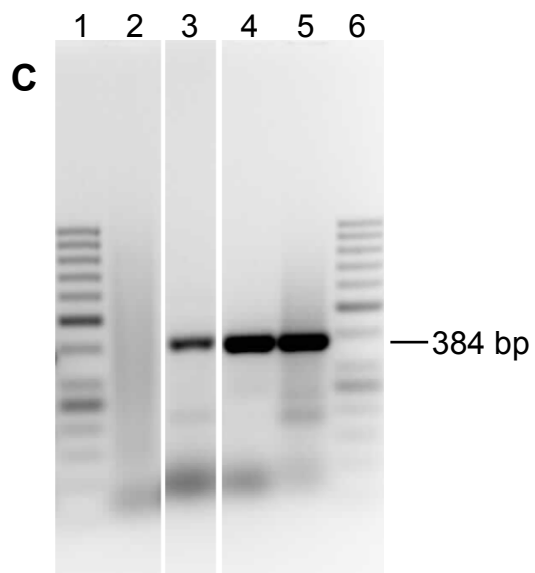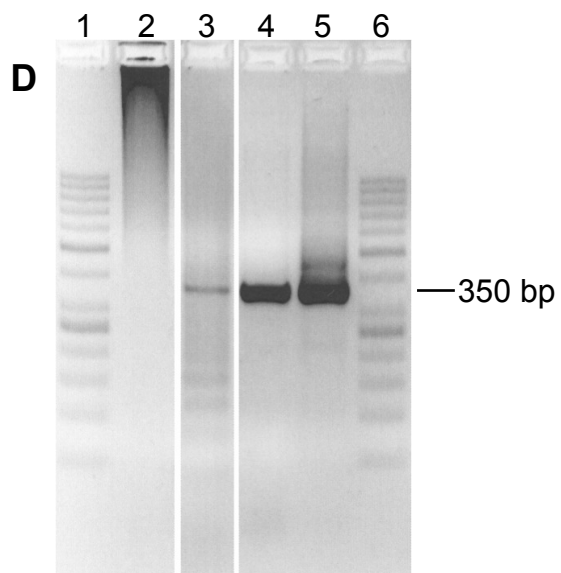

**Supplementary Fig. 1. PCR amplification of *nodC* and *nifH* of seed extracts from inoculated plants. Negro Jamapa bean seeds. Seeds from year 2012. Only second rounds of PCRs are shown.**

Panels A and B. Seeds from plants inoculated with CCGM1.1 strain.

Panel A, PCR for *nodC* amplification. Lanes: 1) molecular weight marker, 2) negative control, 3) seeds from plants inoculated with CCGM1.1, 4) seed extract mixed with CCGM1.1 lysate (to assess seed inhibition), 5) CCGM1.1 lysate, 6) molecular weight marker. Embryos from fresh seeds.

Panel B, PCR for *nifH* amplification. Lanes: 1) molecular weight marker, 2) negative control, 3) seeds from plants inoculated with CCGM1.1, 4) seed extract mixed with CCGM1.1 lysate (to assess seed inhibition), 5) CCGM1.1 lysate, 6) molecular weight marker. Embryos from dry, scarified seeds.

Panels C and D. Seeds from plants inoculated with CCGM7-dsRed strain.

Panel C, PCR for *nodC* amplification. Lanes: 1) molecular weight marker, 2) negative control, 3) seeds from plants inoculated with CCGM7-dsRed, 4) seed extract mixed with CCGM7-dsRed lysate (to assess seed inhibition), 5) CCGM7-dsRed lysate, 6) molecular weight marker. Embryos from fresh seeds.

Panel D, PCR for *nifH* amplification. Lanes: 1) molecular weight marker, 2) negative control, 3) seeds from plants inoculated with CCGM7-dsRed, 4) seed extract mixed with CCGM7-dsRed lysate (to assess seed inhibition), 5) CCGM7-dsRed lysate, 6) molecular weight marker. Embryos from dry, scarified seeds.

Supplementary Figure 2

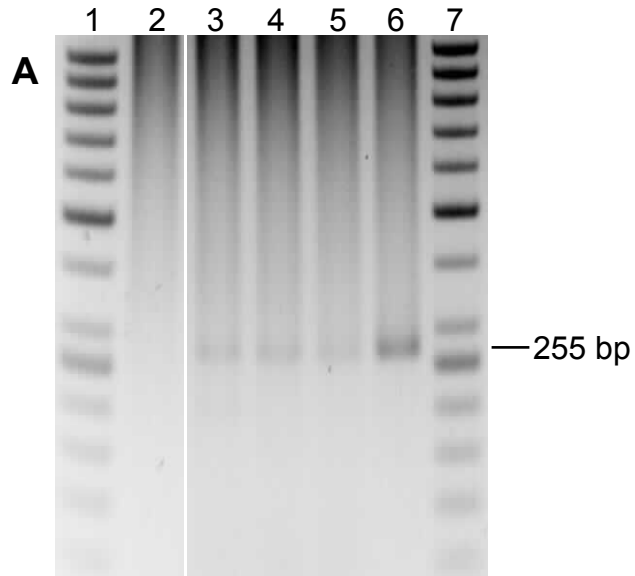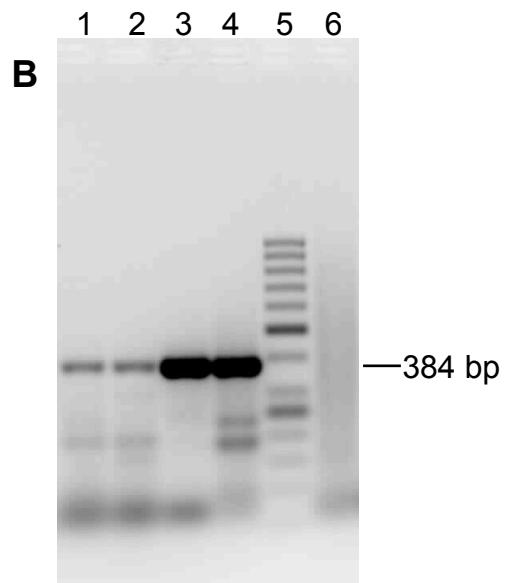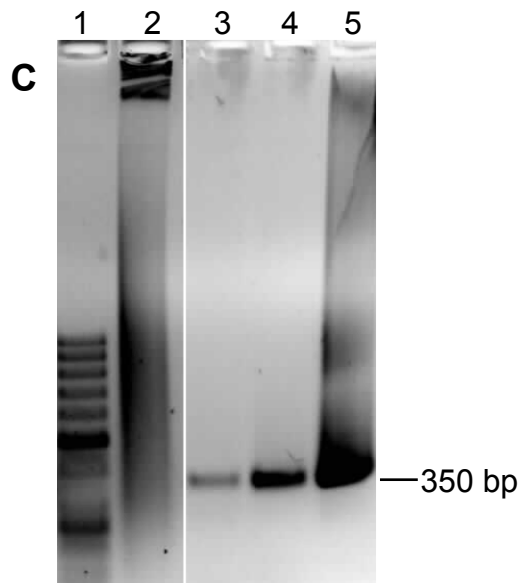

**Supplementary Fig. 2. PCR amplification of *rpoB*, *nodC* and *nifH* of seed extracts from non-inoculated plants fertilized with combined nitrogen. Negro Jamapa bean seeds. Only second rounds of PCRs are shown.**

Panel A, PCR for *rpoB* amplification. Lanes: 1) molecular weight marker, 2) negative control, 3) seed extract of non-inoculated plants fertilized with combined nitrogen from year 2011, 4) seed extract of non-inoculated from year 2012, 5) seed extract mixed with bacterial lysate, 6) bacterial lysate, 7) molecular weight marker. Embryos from fresh seeds. The PCR products of lanes 3 and 4 were sequenced and matched that of CCGM7 strain.

Panel B, PCR for *nodC* amplification. Lanes: 1) seed extract of non-inoculated plants from year 2011, 2) seed extract of non-inoculated plants from year 2012, 3) seed extract mixed with bacterial lysate, 4) bacterial lysate, 5) molecular weight marker, 6) negative control. Embryos from fresh seeds.

Panel C, PCR for *nifH* amplification. Lanes: 1) molecular weight marker, 2) negative control, 3) seed extract mixed with bacterial lysate, 4) bacterial lysate, 5) seed extract of non-inoculated plants from year 2012. Embryos from dry, scarified seeds. The PCR product of lane 5 was sequenced and matched with *nifH* of *Rhizobium* strains.

**Supplementary Table 1. Growth of rhizobia strains in MM with diverse carbon and nitrogen sources.**

| Condition                                             | Strains                 |                                  |                                |                               |
|-------------------------------------------------------|-------------------------|----------------------------------|--------------------------------|-------------------------------|
|                                                       | <i>R. etli</i><br>CFN42 | <i>R. l. phaseoli</i><br>CIAT652 | <i>R. l. phaseoli</i><br>CCGM1 | <i>S. americanum</i><br>CCGM7 |
| MM suppl. with 10 mM NH <sub>4</sub> Cl and 10 mM of: |                         |                                  |                                |                               |
| Succinic acid                                         | +                       | +                                | +                              | +                             |
| Pyruvic acid                                          | +                       | +                                | +                              | +                             |
| Glucose                                               | +                       | +                                | +                              | +                             |
| Mannose                                               | +                       | +                                | +                              | +                             |
| Arabinose                                             | +                       | +                                | +                              | +                             |
| Galactose                                             | +                       | +                                | +                              | +                             |
| Lactose                                               | +                       | +                                | +                              | +                             |
| MM suppl. with 10 mM KNO <sub>3</sub> and 10mM of:    |                         |                                  |                                |                               |
| Succinic acid                                         | +                       | +                                | +                              | +                             |
| Pyruvic acid                                          | +                       | +                                | +                              | +                             |
| Glucose                                               | ++                      | ++                               | +                              | +                             |
| Mannose                                               | ++                      | ++                               | +                              | +                             |
| Arabinose                                             | +                       | ++                               | +                              | +                             |
| Galactose                                             | ++                      | ++                               | +                              | +                             |
| Lactose                                               | -                       | ++                               | -                              | -                             |
| MM suppl. with (as N and C source):                   |                         |                                  |                                |                               |
| Glutamic acid 1 mM                                    | +                       | +                                | -                              | +                             |
| Glutamic acid 5 mM                                    | +                       | +                                | +                              | +                             |
| Glutamic acid 10 mM                                   | +                       | +                                | +                              | +                             |
| MM suppl. with (as N and C source):                   |                         |                                  |                                |                               |
| Glutamine 1 mM                                        | -                       | -                                | -                              | +                             |
| Glutamine 5 mM                                        | +                       | +                                | +                              | +                             |
| Glutamine 10 mM                                       | +                       | +                                | +                              | +                             |

**Supplementary Table 2. Growth of rhizobia strains in diverse stress conditions.**

| Condition          | Strains                 |                                  |                                |                               |
|--------------------|-------------------------|----------------------------------|--------------------------------|-------------------------------|
|                    | <i>R. etli</i><br>CFN42 | <i>R. l. phaseoli</i><br>CIAT652 | <i>R. l. phaseoli</i><br>CCGM1 | <i>S. americanum</i><br>CCGM7 |
| Temperature (°C)   |                         |                                  |                                |                               |
| 30                 | ++                      | ++                               | ++                             | +++                           |
| 35                 | +                       | +                                | +                              | ++                            |
| 37                 | +                       | +                                | +                              | ++                            |
| 38                 | +                       | -                                | -                              | -                             |
| 39                 | +                       | -                                | -                              | -                             |
|                    |                         |                                  |                                |                               |
| Salt (% NaCl)      |                         |                                  |                                |                               |
| 0                  | ++                      | ++                               | ++                             | +++                           |
| 0.25               | ++                      | ++                               | +                              | ++                            |
| 0.5                | ++                      | +                                | +                              | ++                            |
| 0.75               | +                       | +                                | -                              | +                             |
| 0.9                | +                       | -                                | -                              | +                             |
| 1.0                | -                       | -                                | -                              | +                             |
| 1.2                | -                       | -                                | -                              | -                             |
|                    |                         |                                  |                                |                               |
| Chloride (% NaClO) |                         |                                  |                                |                               |
| 0                  | ++                      | ++                               | ++                             | +++                           |
| 0.1                | ++                      | ++                               | ++                             | ++                            |
| 0.2                | +                       | +                                | -                              | +                             |
| 0.3                | +                       | +                                | -                              | -                             |
| 0.4                | +                       | -                                | -                              | -                             |
| 0.5                | -                       | -                                | -                              | -                             |
|                    |                         |                                  |                                |                               |
| pH                 |                         |                                  |                                |                               |
| 10                 | -                       | -                                | -                              | +                             |
| 9.8                | -                       | -                                | -                              | +                             |
| 9.5                | +                       | -                                | -                              | +                             |
| 9.3                | +                       | +                                | -                              | ++                            |
| 9.0                | +                       | +                                | -                              | ++                            |
| 8.5                | +                       | +                                | -                              | ++                            |
| 8.0                | +                       | +                                | +                              | ++                            |
| 7.2, control PY    | ++                      | ++                               | ++                             | +++                           |
| 6.0                | +                       | +                                | +                              | ++                            |
| 5.8                | +                       | +                                | +                              | +                             |

|     |   |   |   |   |
|-----|---|---|---|---|
| 5.6 | + | + | + | + |
| 5.4 | + | + | + | - |
| 5.2 | + | + | + | - |
| 4.9 | + | + | + | - |
| 4.8 | + | + | + | - |
| 4.7 | + | + | + | - |
| 4.6 | - | - | - | - |

**Supplementary Table 3. Part A. Predicted CCGM1 CDS not shared with the *Rhizobium* group (*R. phaseoli*, *R. etli*).**

| <b>CDS</b>     | <b>PREDICTED FUNCTION</b>                      | <b>GENE NAME</b> |
|----------------|------------------------------------------------|------------------|
| RLPCCGM1_c0005 | micrococcal nuclease (thermonuclease)          | -                |
| RLPCCGM1_c0006 | hypothetical protein                           | -                |
| RLPCCGM1_c0029 | hypothetical protein                           | -                |
| RLPCCGM1_c0033 | mobile element protein                         | -                |
| RLPCCGM1_c0047 | cellulosome anchoring protein                  | -                |
| RLPCCGM1_c0050 | acyltransferase protein                        | -                |
| RLPCCGM1_c0061 | transcriptional regulator GntR                 | -                |
| RLPCCGM1_c0120 | hypothetical protein                           | -                |
| RLPCCGM1_c0161 | hypothetical protein                           | -                |
| RLPCCGM1_c0169 | oxidoreductase                                 | -                |
| RLPCCGM1_c0204 | hypothetical protein                           | -                |
| RLPCCGM1_c0205 | hypothetical protein                           | -                |
| RLPCCGM1_c0207 | hypothetical protein                           | -                |
| RLPCCGM1_c0208 | hypothetical protein                           | -                |
| RLPCCGM1_c0242 | membrane alanine aminopeptidase N              | -                |
| RLPCCGM1_c0244 | hypothetical protein                           | -                |
| RLPCCGM1_c0285 | hypothetical protein                           | -                |
| RLPCCGM1_c0296 | porin                                          | -                |
| RLPCCGM1_c0318 | hypothetical protein                           | -                |
| RLPCCGM1_c0397 | monooxygenase                                  | -                |
| RLPCCGM1_c0398 | PadR transcriptional regulator                 | -                |
| RLPCCGM1_c0403 | regulatory inactivation of DnaA Hda protein    | -                |
| RLPCCGM1_c0407 | adenylate cyclase                              | -                |
| RLPCCGM1_c0408 | adenylate cyclase                              | -                |
| RLPCCGM1_c0434 | hypothetical protein                           | -                |
| RLPCCGM1_c0435 | hypothetical protein                           | -                |
| RLPCCGM1_c0436 | hypothetical protein                           | -                |
| RLPCCGM1_c0438 | 3-demethylubiquinone-9 3-methyltransferase     | -                |
| RLPCCGM1_c0446 | transposase                                    | -                |
| RLPCCGM1_c0458 | cellulose synthase catalytic subunit           | -                |
| RLPCCGM1_c0497 | hypothetical protein                           | -                |
| RLPCCGM1_c0500 | adenylate cyclase                              | -                |
| RLPCCGM1_c0535 | biotin-protein ligase                          | -                |
| RLPCCGM1_c0626 | hypothetical protein                           | -                |
| RLPCCGM1_c0657 | hypothetical protein                           | -                |
| RLPCCGM1_c0679 | periplasmic protein-like protein               | -                |
| RLPCCGM1_c0681 | ornithine cyclodeaminase                       | -                |
| RLPCCGM1_c0682 | mandelate racemase/muconate lactonizing enzyme | -                |
| RLPCCGM1_c0683 | LysR family transcriptional regulator          | -                |
| RLPCCGM1_c0684 | DNA helicase                                   | -                |
| RLPCCGM1_c0685 | DNA helicase                                   | -                |
| RLPCCGM1_c0707 | hypothetical protein                           | -                |
| RLPCCGM1_c0748 | soluble lytic murein transglycosylase          | -                |
| RLPCCGM1_c0764 | phage terminase, large subunit                 | -                |
| RLPCCGM1_c0765 | hypothetical protein                           | -                |
| RLPCCGM1_c0766 | hypothetical protein                           | -                |
| RLPCCGM1_c0767 | hypothetical protein                           | -                |
| RLPCCGM1_c0768 | hypothetical protein                           | -                |
| RLPCCGM1_c0769 | hypothetical protein                           | -                |
| RLPCCGM1_c0770 | hypothetical protein                           | -                |
| RLPCCGM1_c0771 | hypothetical protein                           | -                |
| RLPCCGM1_c0772 | hypothetical protein                           | -                |



|                |                                                           |   |
|----------------|-----------------------------------------------------------|---|
| RLPCCGM1_c0773 | hypothetical protein                                      | - |
| RLPCCGM1_c0781 | transposase                                               | - |
| RLPCCGM1_c0787 | DNA repair protein RadC                                   | - |
| RLPCCGM1_c0797 | acetyltransferase protein                                 | - |
| RLPCCGM1_c0810 | biotin carboxyl carrier protein of acetyl-CoA carboxylase | - |
| RLPCCGM1_c0832 | hypothetical protein                                      | - |
| RLPCCGM1_c0833 | hypothetical protein                                      | - |
| RLPCCGM1_c0834 | hypothetical protein                                      | - |
| RLPCCGM1_c0835 | hypothetical protein                                      | - |
| RLPCCGM1_c0836 | hypothetical protein                                      | - |
| RLPCCGM1_c0837 | hypothetical protein                                      | - |
| RLPCCGM1_c0838 | hypothetical protein                                      | - |
| RLPCCGM1_c0839 | hypothetical protein                                      | - |
| RLPCCGM1_c0840 | phage protein                                             | - |
| RLPCCGM1_c0844 | hypothetical protein                                      | - |
| RLPCCGM1_c0846 | hypothetical protein                                      | - |
| RLPCCGM1_c0847 | phage protein                                             | - |
| RLPCCGM1_c0848 | hypothetical protein                                      | - |
| RLPCCGM1_c0850 | hypothetical protein                                      | - |
| RLPCCGM1_c0851 | hypothetical protein                                      | - |
| RLPCCGM1_c0852 | flagellar protein FlgJ                                    | - |
| RLPCCGM1_c0853 | hypothetical protein                                      | - |
| RLPCCGM1_c0855 | hypothetical protein                                      | - |
| RLPCCGM1_c0856 | hypothetical protein                                      | - |
| RLPCCGM1_c0857 | hypothetical protein                                      | - |
| RLPCCGM1_c0858 | phage antirepressor protein                               | - |
| RLPCCGM1_c0859 | hypothetical protein                                      | - |
| RLPCCGM1_c0861 | hypothetical protein                                      | - |
| RLPCCGM1_c0862 | hypothetical protein                                      | - |
| RLPCCGM1_c0863 | hypothetical protein                                      | - |
| RLPCCGM1_c0864 | transmembrane protein                                     | - |
| RLPCCGM1_c0865 | succinoglycan biosynthesis protein exoI                   | - |
| RLPCCGM1_c0868 | hypothetical protein                                      | - |
| RLPCCGM1_c0874 | hypothetical protein                                      | - |
| RLPCCGM1_c0939 | polar amino acid transport system permease protein        | - |
| RLPCCGM1_c0940 | polar amino acid transport system permease protein        | - |
| RLPCCGM1_c0954 | siroheme synthase                                         | - |
| RLPCCGM1_c0958 | 2-octaprenyl-6-methoxyphenol hydroxylase                  | - |
| RLPCCGM1_c0959 | 2-octaprenyl-6-methoxyphenol hydroxylase                  | - |
| RLPCCGM1_c1091 | hypothetical protein                                      | - |
| RLPCCGM1_c1132 | citrate synthase                                          | - |
| RLPCCGM1_c1165 | transposase                                               | - |
| RLPCCGM1_c1188 | transcriptional regulator protein                         | - |
| RLPCCGM1_c1236 | hypothetical protein                                      | - |
| RLPCCGM1_c1238 | hypothetical protein                                      | - |
| RLPCCGM1_c1239 | hypothetical protein                                      | - |
| RLPCCGM1_c1243 | two component sensor kinase                               | - |
| RLPCCGM1_c1244 | hypothetical protein                                      | - |
| RLPCCGM1_c1247 | hypothetical protein                                      | - |
| RLPCCGM1_c1248 | hypothetical protein                                      | - |
| RLPCCGM1_c1249 | hypothetical protein                                      | - |
| RLPCCGM1_c1250 | phage endolysin                                           | - |
| RLPCCGM1_c1251 | hypothetical protein                                      | - |
| RLPCCGM1_c1252 | hypothetical protein                                      | - |
| RLPCCGM1_c1253 | hypothetical protein                                      | - |

|                |                                     |   |
|----------------|-------------------------------------|---|
| RLPCCGM1_c1254 | hypothetical protein                | - |
| RLPCCGM1_c1255 | hypothetical protein                | - |
| RLPCCGM1_c1256 | hypothetical protein                | - |
| RLPCCGM1_c1257 | hypothetical protein                | - |
| RLPCCGM1_c1258 | hypothetical protein                | - |
| RLPCCGM1_c1259 | hypothetical protein                | - |
| RLPCCGM1_c1260 | hypothetical protein                | - |
| RLPCCGM1_c1261 | hypothetical protein                | - |
| RLPCCGM1_c1262 | hypothetical protein                | - |
| RLPCCGM1_c1263 | hypothetical protein                | - |
| RLPCCGM1_c1264 | hypothetical protein                | - |
| RLPCCGM1_c1265 | hypothetical protein                | - |
| RLPCCGM1_c1266 | hypothetical protein                | - |
| RLPCCGM1_c1267 | hypothetical protein                | - |
| RLPCCGM1_c1268 | SAM-dependent methyltransferase     | - |
| RLPCCGM1_c1269 | hypothetical protein                | - |
| RLPCCGM1_c1271 | hypothetical protein                | - |
| RLPCCGM1_c1272 | phage protein                       | - |
| RLPCCGM1_c1273 | phage protein                       | - |
| RLPCCGM1_c1274 | hypothetical protein                | - |
| RLPCCGM1_c1275 | peptidase S49                       | - |
| RLPCCGM1_c1276 | phage portal protein, lambda family | - |
| RLPCCGM1_c1277 | hypothetical protein                | - |
| RLPCCGM1_c1278 | hypothetical protein                | - |
| RLPCCGM1_c1279 | bacteriophage tail assembly protein | - |
| RLPCCGM1_c1280 | hypothetical protein                | - |
| RLPCCGM1_c1281 | hypothetical protein                | - |
| RLPCCGM1_c1282 | hypothetical protein                | - |
| RLPCCGM1_c1283 | hypothetical protein                | - |
| RLPCCGM1_c1284 | hypothetical protein                | - |
| RLPCCGM1_c1285 | hypothetical protein                | - |
| RLPCCGM1_c1286 | hypothetical protein                | - |
| RLPCCGM1_c1287 | hypothetical protein                | - |
| RLPCCGM1_c1288 | hypothetical protein                | - |
| RLPCCGM1_c1289 | hypothetical protein                | - |
| RLPCCGM1_c1290 | hypothetical protein                | - |
| RLPCCGM1_c1291 | hypothetical protein                | - |
| RLPCCGM1_c1292 | hypothetical protein                | - |
| RLPCCGM1_c1293 | hypothetical protein                | - |
| RLPCCGM1_c1294 | hypothetical protein                | - |
| RLPCCGM1_c1295 | hypothetical protein                | - |
| RLPCCGM1_c1296 | phage repressor                     | - |
| RLPCCGM1_c1297 | hypothetical protein                | - |
| RLPCCGM1_c1298 | hypothetical protein                | - |
| RLPCCGM1_c1299 | hypothetical protein                | - |
| RLPCCGM1_c1300 | hypothetical protein                | - |
| RLPCCGM1_c1301 | hypothetical protein                | - |
| RLPCCGM1_c1302 | hypothetical protein                | - |
| RLPCCGM1_c1303 | hypothetical protein                | - |
| RLPCCGM1_c1304 | hypothetical protein                | - |
| RLPCCGM1_c1305 | hypothetical protein                | - |
| RLPCCGM1_c1306 | hypothetical protein                | - |
| RLPCCGM1_c1307 | hypothetical protein                | - |
| RLPCCGM1_c1339 | hypothetical protein                | - |
| RLPCCGM1_c1354 | mobile element protein              | - |

|                |                                                   |   |
|----------------|---------------------------------------------------|---|
| RLPCCGM1_c1362 | hypothetical protein                              | - |
| RLPCCGM1_c1389 | hypothetical protein                              | - |
| RLPCCGM1_c1419 | sensory box/GGDEF family protein                  | - |
| RLPCCGM1_c1424 | muconate cycloisomerase                           | - |
| RLPCCGM1_c1510 | hypothetical protein                              | - |
| RLPCCGM1_c1531 | transposase                                       | - |
| RLPCCGM1_c1551 | 3-oxoacyl-(acyl-carrier-protein) synthase         | - |
| RLPCCGM1_c1558 | L-threonine 3-O-phosphate decarboxylase           | - |
| RLPCCGM1_c1584 | haloacid dehalogenase-like hydrolase              | - |
| RLPCCGM1_c1601 | dihydroxyacetone kinase, ATP-dependent            | - |
| RLPCCGM1_c1603 | hypothetical protein                              | - |
| RLPCCGM1_c1606 | hypothetical protein                              | - |
| RLPCCGM1_c1610 | MutT/NUDIX family NTP pyrophosphohydrolase        | - |
| RLPCCGM1_c1614 | oxidoreductase                                    | - |
| RLPCCGM1_c1634 | hypothetical protein                              | - |
| RLPCCGM1_c1646 | hypothetical protein                              | - |
| RLPCCGM1_c1654 | hypothetical protein                              | - |
| RLPCCGM1_c1655 | hypothetical protein                              | - |
| RLPCCGM1_c1658 | transposase                                       | - |
| RLPCCGM1_c1714 | hypothetical protein                              | - |
| RLPCCGM1_c1731 | hypothetical protein                              | - |
| RLPCCGM1_c1823 | transcriptional regulator, TetR family            | - |
| RLPCCGM1_c1847 | hypothetical protein                              | - |
| RLPCCGM1_c1864 | hypothetical protein                              | - |
| RLPCCGM1_c1987 | hypothetical protein                              | - |
| RLPCCGM1_c2011 | hypothetical protein                              | - |
| RLPCCGM1_c2012 | adenine specific DNA methyltransferase, D12 class | - |
| RLPCCGM1_c2014 | hypothetical protein                              | - |
| RLPCCGM1_c2015 | hypothetical protein                              | - |
| RLPCCGM1_c2016 | tail protein                                      | - |
| RLPCCGM1_c2017 | phage FluMu protein gp47                          | - |
| RLPCCGM1_c2018 | hypothetical protein                              | - |
| RLPCCGM1_c2019 | Mu-like prophage protein gp45-like protein        | - |
| RLPCCGM1_c2020 | Mu P family protein                               | - |
| RLPCCGM1_c2021 | Mu-like prophage DNA circulation protein          | - |
| RLPCCGM1_c2022 | hypothetical protein                              | - |
| RLPCCGM1_c2023 | hypothetical protein                              | - |
| RLPCCGM1_c2024 | hypothetical protein                              | - |
| RLPCCGM1_c2025 | hypothetical protein                              | - |
| RLPCCGM1_c2026 | Mu tail sheath family protein                     | - |
| RLPCCGM1_c2027 | hypothetical protein                              | - |
| RLPCCGM1_c2028 | hypothetical protein                              | - |
| RLPCCGM1_c2029 | hypothetical protein                              | - |
| RLPCCGM1_c2030 | hypothetical protein                              | - |
| RLPCCGM1_c2031 | hypothetical protein                              | - |
| RLPCCGM1_c2032 | Mu-like prophage FluMu major head subunit         | - |
| RLPCCGM1_c2033 | hypothetical protein                              | - |
| RLPCCGM1_c2034 | Mu-like prophage I protein-like protein           | - |
| RLPCCGM1_c2035 | phage virion morphogenesis protein                | - |
| RLPCCGM1_c2036 | phage (Mu-like) virion morphogenesis protein      | - |
| RLPCCGM1_c2037 | Mu-like prophage FluMu protein gp29               | - |
| RLPCCGM1_c2038 | Mu-like prophage FluMu protein gp28               | - |
| RLPCCGM1_c2039 | Mu-like prophage FluMu protein gp27               | - |
| RLPCCGM1_c2040 | phage protein                                     | - |
| RLPCCGM1_c2041 | hypothetical protein                              | - |

|                |                                                               |      |
|----------------|---------------------------------------------------------------|------|
| RLPCCGM1_c2042 | hypothetical protein                                          | -    |
| RLPCCGM1_c2043 | hypothetical protein                                          | -    |
| RLPCCGM1_c2044 | hypothetical protein                                          | -    |
| RLPCCGM1_c2045 | hypothetical protein                                          | -    |
| RLPCCGM1_c2046 | protein gp16                                                  | -    |
| RLPCCGM1_c2047 | hypothetical protein                                          | -    |
| RLPCCGM1_c2048 | hypothetical protein                                          | -    |
| RLPCCGM1_c2049 | hypothetical protein                                          | -    |
| RLPCCGM1_c2050 | hypothetical protein                                          | -    |
| RLPCCGM1_c2051 | hypothetical protein                                          | -    |
| RLPCCGM1_c2052 | hypothetical protein                                          | -    |
| RLPCCGM1_c2053 | bacteriophage DNA transposition protein B                     | -    |
| RLPCCGM1_c2054 | transposase                                                   | -    |
| RLPCCGM1_c2055 | hypothetical protein                                          | -    |
| RLPCCGM1_c2056 | chromosome partitioning protein parB                          | parB |
| RLPCCGM1_c2057 | hypothetical protein                                          | -    |
| RLPCCGM1_c2058 | hypothetical protein                                          | -    |
| RLPCCGM1_c2059 | hypothetical protein                                          | -    |
| RLPCCGM1_c2060 | hypothetical protein                                          | -    |
| RLPCCGM1_c2061 | hypothetical protein                                          | -    |
| RLPCCGM1_c2100 | hypothetical protein                                          | -    |
| RLPCCGM1_c2128 | dehydrogenase                                                 | -    |
| RLPCCGM1_c2253 | addiction module antidote protein, CopG/Arc/MetJ family       | -    |
| RLPCCGM1_c2254 | hypothetical protein                                          | -    |
| RLPCCGM1_c2272 | antitoxin ParD                                                | parD |
| RLPCCGM1_c2273 | plasmid stabilization system                                  | -    |
| RLPCCGM1_c2306 | hypothetical protein                                          | -    |
| RLPCCGM1_c2363 | mannose-1-phosphate guanylyltransferase                       | -    |
| RLPCCGM1_c2376 | hypothetical protein                                          | -    |
| RLPCCGM1_c2448 | hypothetical protein                                          | -    |
| RLPCCGM1_c2536 | spermidine Putrescine ABC transporter permease component potC | -    |
| RLPCCGM1_c2657 | transcriptional regulator IrhA                                | -    |
| RLPCCGM1_c2709 | adenylate cyclase protein                                     | -    |
| RLPCCGM1_c2743 | hypothetical protein                                          | -    |
| RLPCCGM1_c2781 | hypothetical protein                                          | -    |
| RLPCCGM1_c2830 | hypothetical protein                                          | -    |
| RLPCCGM1_c2876 | ribonuclease                                                  | -    |
| RLPCCGM1_c2921 | transposase                                                   | -    |
| RLPCCGM1_c2962 | hypothetical protein                                          | -    |
| RLPCCGM1_c3052 | hypothetical protein                                          | -    |
| RLPCCGM1_c3157 | hypothetical protein                                          | -    |
| RLPCCGM1_c3175 | D-amino-acid dehydrogenase                                    | -    |
| RLPCCGM1_c3176 | amino acid ABC transporter ATP-binding protein                | -    |
| RLPCCGM1_c3177 | polar amino acid ABC transporter, inner membrane subunit      | -    |
| RLPCCGM1_c3178 | extracellular solute-binding protein                          | -    |
| RLPCCGM1_c3179 | GntR family transcriptional regulator                         | -    |
| RLPCCGM1_c3201 | transport protein                                             | -    |
| RLPCCGM1_c3202 | transcriptional regulator, LysR family                        | -    |
| RLPCCGM1_c3278 | membrane-bound lytic murein transglycosylase                  | mltA |
| RLPCCGM1_c3335 | Superfamily I DNA/RNA helicase protein                        | -    |
| RLPCCGM1_c3336 | Superfamily I DNA/RNA helicase protein                        | -    |
| RLPCCGM1_c3373 | hypothetical protein                                          | -    |
| RLPCCGM1_c3375 | hypothetical protein                                          | -    |
| RLPCCGM1_c3376 | pvuII DNA methyltransferase                                   | -    |
| RLPCCGM1_c3377 | integrase family protein                                      | -    |

|                |                                                                       |      |
|----------------|-----------------------------------------------------------------------|------|
| RLPCCGM1_c3540 | hypothetical protein                                                  | -    |
| RLPCCGM1_c3593 | acetyltransferase protein                                             | -    |
| RLPCCGM1_c3672 | hypothetical protein                                                  | -    |
| RLPCCGM1_c3753 | two-component response regulator protein                              | -    |
| RLPCCGM1_c3798 | hypothetical protein                                                  | -    |
| RLPCCGM1_c4039 | methyltransferase type 11                                             | -    |
| RLPCCGM1_c4052 | glycosyl transferase                                                  | -    |
| RLPCCGM1_c4053 | methyltransferase type 11                                             | -    |
| RLPCCGM1_c4054 | DegT/DnrJ/EryC1/StrS aminotransferase family protein                  | -    |
| RLPCCGM1_c4055 | hypothetical protein                                                  | -    |
| RLPCCGM1_c4057 | glycosyl transferase                                                  | -    |
| RLPCCGM1_c4071 | hypothetical protein                                                  | -    |
| RLPCCGM1_c4074 | hypothetical protein                                                  | -    |
| RLPCCGM1_c4131 | scaffold protein for (4Fe-4S) cluster assembly ApbC, MRP-like protein | -    |
| RLPCCGM1_c4166 | transposase                                                           | -    |
| RLPCCGM1_c4179 | cyl-CoA dehydrogenase protein                                         | -    |
| RLPCCGM1_c4207 | diguanylate cyclase/phosphodiesterase with PAS/PAC sensor(s)          | -    |
| RLPCCGM1_c4254 | glutamate 5-kinase                                                    | -    |
| RLPCCGM1_c4273 | hypothetical protein                                                  | -    |
| RLPCCGM1_c4277 | acetyltransferase                                                     | -    |
| RLPCCGM1_c4278 | transcriptional regulator                                             | -    |
| RLPCCGM1_c4292 | hypothetical protein                                                  | -    |
| RLPCCGM1_c4297 | hypothetical protein                                                  | -    |
| RLPCCGM1_p0001 | methyl-accepting chemotaxis protein                                   | -    |
| RLPCCGM1_p0002 | micrococcal nuclease (thermonuclease)                                 | -    |
| RLPCCGM1_p0004 | hypothetical protein                                                  | -    |
| RLPCCGM1_p0005 | hypothetical protein                                                  | -    |
| RLPCCGM1_p0006 | hypothetical protein                                                  | -    |
| RLPCCGM1_p0007 | hypothetical protein                                                  | -    |
| RLPCCGM1_p0008 | hypothetical protein                                                  | -    |
| RLPCCGM1_p0009 | exported glutamine-rich protein                                       | -    |
| RLPCCGM1_p0010 | transmembrane protein                                                 | -    |
| RLPCCGM1_p0012 | hypothetical protein                                                  | -    |
| RLPCCGM1_p0013 | phenazine biosynthesis protein PhzF                                   | -    |
| RLPCCGM1_p0014 | manganese transport protein                                           | -    |
| RLPCCGM1_p0015 | hypothetical protein                                                  | -    |
| RLPCCGM1_p0017 | hypothetical protein                                                  | -    |
| RLPCCGM1_p0018 | hypothetical protein                                                  | -    |
| RLPCCGM1_p0019 | hypothetical protein                                                  | -    |
| RLPCCGM1_p0020 | chemotaxis protein methyltransferase CheR                             | cheR |
| RLPCCGM1_p0021 | hypothetical protein                                                  | -    |
| RLPCCGM1_p0022 | hypothetical protein                                                  | -    |
| RLPCCGM1_p0023 | sensor histidine kinase                                               | -    |
| RLPCCGM1_p0024 | hypothetical protein                                                  | -    |
| RLPCCGM1_p0025 | hypothetical protein                                                  | -    |
| RLPCCGM1_p0026 | transcriptional regulator, PadR family                                | -    |
| RLPCCGM1_p0027 | zinc-binding dehydrogenase                                            | -    |
| RLPCCGM1_p0028 | hypothetical protein                                                  | -    |
| RLPCCGM1_p0029 | hypothetical protein                                                  | -    |
| RLPCCGM1_p0030 | AraC family transcriptional regulator                                 | -    |
| RLPCCGM1_p0031 | oxidoreductase                                                        | -    |
| RLPCCGM1_p0032 | nucleoside-diphosphate-sugar epimerase                                | -    |
| RLPCCGM1_p0033 | hypothetical protein                                                  | -    |
| RLPCCGM1_p0034 | aldo-keto reductase                                                   | -    |
| RLPCCGM1_p0038 | hicB family protein                                                   | -    |

|                |                                                                       |      |
|----------------|-----------------------------------------------------------------------|------|
| RLPCCGM1_p0039 | hypothetical protein                                                  | -    |
| RLPCCGM1_p0040 | potassium efflux system KefA protein                                  | -    |
| RLPCCGM1_p0041 | arylsulfatase                                                         | -    |
| RLPCCGM1_p0043 | hypothetical protein                                                  | -    |
| RLPCCGM1_p0044 | hypothetical protein                                                  | -    |
| RLPCCGM1_p0046 | hypothetical protein                                                  | -    |
| RLPCCGM1_p0047 | hypothetical protein                                                  | -    |
| RLPCCGM1_p0048 | hypothetical protein                                                  | -    |
| RLPCCGM1_p0049 | hypothetical protein                                                  | -    |
| RLPCCGM1_p0050 | hypothetical protein                                                  | -    |
| RLPCCGM1_p0051 | HupE-UreJ family metal transporter                                    | hupE |
| RLPCCGM1_p0052 | phosphoglycerate kinase                                               | -    |
| RLPCCGM1_p0053 | hypothetical protein                                                  | -    |
| RLPCCGM1_p0054 | cysteine rich repeat domain protein                                   | -    |
| RLPCCGM1_p0055 | OmpA/MotB domain protein                                              | -    |
| RLPCCGM1_p0056 | hypothetical protein                                                  | -    |
| RLPCCGM1_p0057 | hypothetical protein                                                  | -    |
| RLPCCGM1_p0058 | hypothetical protein                                                  | -    |
| RLPCCGM1_p0060 | hypothetical protein                                                  | -    |
| RLPCCGM1_p0062 | hypothetical protein                                                  | -    |
| RLPCCGM1_p0064 | endoribonuclease L- <i>psp</i> family protein                         | -    |
| RLPCCGM1_p0067 | hypothetical protein                                                  | -    |
| RLPCCGM1_p0068 | aldehyde dehydrogenase                                                | -    |
| RLPCCGM1_p0069 | LysR family transcriptional regulator                                 | -    |
| RLPCCGM1_p0079 | hypothetical protein                                                  | -    |
| RLPCCGM1_p0082 | cytochrome c-like protein                                             | -    |
| RLPCCGM1_p0083 | MerR family transcriptional regulator                                 | -    |
| RLPCCGM1_p0085 | adenylate/guanylate cyclase                                           | -    |
| RLPCCGM1_p0086 | hypothetical protein                                                  | -    |
| RLPCCGM1_p0088 | hypothetical protein                                                  | -    |
| RLPCCGM1_p0089 | hypothetical protein                                                  | -    |
| RLPCCGM1_p0090 | hypothetical protein                                                  | -    |
| RLPCCGM1_p0095 | diguanylate cyclase/phosphodiesterase                                 | -    |
| RLPCCGM1_p0096 | glycosyl transferase family protein                                   | -    |
| RLPCCGM1_p0098 | two component transcriptional regulator                               | two  |
| RLPCCGM1_p0099 | response regulator receiver domain protein (CheY-like receiver)       | -    |
| RLPCCGM1_p0100 | transcriptional regulator, Cro/CI family                              | -    |
| RLPCCGM1_p0101 | transmembrane protein                                                 | -    |
| RLPCCGM1_p0102 | hypothetical protein                                                  | -    |
| RLPCCGM1_p0104 | transposase                                                           | -    |
| RLPCCGM1_p0105 | prolyl endopeptidase                                                  | -    |
| RLPCCGM1_p0106 | prolyl endopeptidase                                                  | -    |
| RLPCCGM1_p0107 | hypothetical protein                                                  | -    |
| RLPCCGM1_p0108 | transposase                                                           | -    |
| RLPCCGM1_p0110 | hypothetical protein                                                  | -    |
| RLPCCGM1_p0111 | integrase protein                                                     | -    |
| RLPCCGM1_p0112 | hypothetical protein                                                  | -    |
| RLPCCGM1_p0113 | hypothetical protein                                                  | -    |
| RLPCCGM1_p0117 | gifsy-2 prophage protein                                              | -    |
| RLPCCGM1_p0119 | gifsy-2 prophage protein                                              | -    |
| RLPCCGM1_p0120 | chaperone protein HtpG                                                | -    |
| RLPCCGM1_p0121 | two-component response regulator protein                              | -    |
| RLPCCGM1_p0122 | integrase/recombinase clustered with segregation and condensation pro | -    |
| RLPCCGM1_p0123 | integrase/recombinase clustered with segregation and condensation pro | -    |
| RLPCCGM1_p0124 | hypothetical protein                                                  | -    |

|                |                                                                       |      |
|----------------|-----------------------------------------------------------------------|------|
| RLPCCGM1_p0145 | hydrolase of the alpha/beta superfamily                               | -    |
| RLPCCGM1_p0166 | transposase                                                           | -    |
| RLPCCGM1_p0181 | TetR family transcriptional regulator                                 | -    |
| RLPCCGM1_p0182 | oxidoreductase                                                        | -    |
| RLPCCGM1_p0237 | insertion sequence transposase protein                                | -    |
| RLPCCGM1_p0246 | ABC transporter, periplasmic substrate-binding protein                | -    |
| RLPCCGM1_p0247 | ABC transporter, periplasmic substrate-binding protein                | -    |
| RLPCCGM1_p0282 | transcriptional regulator protein                                     | -    |
| RLPCCGM1_p0283 | metal activated pyridoxal enzyme                                      | -    |
| RLPCCGM1_p0286 | glutathione S-transferase                                             | -    |
| RLPCCGM1_p0287 | isochorismatase hydrolase                                             | -    |
| RLPCCGM1_p0302 | inner membrane component of tripartite multidrug resistance system    | -    |
| RLPCCGM1_p0310 | hypothetical protein                                                  | -    |
| RLPCCGM1_p0346 | hypothetical protein                                                  | -    |
| RLPCCGM1_p0470 | hypothetical protein                                                  | -    |
| RLPCCGM1_p0471 | hypothetical protein                                                  | -    |
| RLPCCGM1_p0472 | hypothetical protein                                                  | -    |
| RLPCCGM1_p0498 | ankyrin repeat-rich membrane spanning protein                         | -    |
| RLPCCGM1_p0520 | multi-sensor hybrid histidine kinase                                  | -    |
| RLPCCGM1_p0528 | hypothetical protein                                                  | -    |
| RLPCCGM1_p0530 | iIron-uptake factor PiuB                                              | -    |
| RLPCCGM1_p0531 | hypothetical protein                                                  | -    |
| RLPCCGM1_p0533 | insertion sequence transposase protein                                | -    |
| RLPCCGM1_p0537 | hypothetical protein                                                  | -    |
| RLPCCGM1_p0538 | hypothetical protein                                                  | -    |
| RLPCCGM1_p0547 | hypothetical protein                                                  | -    |
| RLPCCGM1_p0551 | retron-type RNA-directed DNA polymerase                               | -    |
| RLPCCGM1_p0552 | hypothetical protein                                                  | -    |
| RLPCCGM1_p0565 | transposase                                                           | -    |
| RLPCCGM1_p0566 | hypothetical protein                                                  | -    |
| RLPCCGM1_p0577 | hypothetical protein                                                  | -    |
| RLPCCGM1_p0578 | transcriptional regulator protein                                     | -    |
| RLPCCGM1_p0593 | type III secretion bridge between inner and outermembrane lipoprotein | -    |
| RLPCCGM1_p0601 | hypothetical protein                                                  | -    |
| RLPCCGM1_p0605 | transposase                                                           | -    |
| RLPCCGM1_p0606 | sensor histidine kinase                                               | -    |
| RLPCCGM1_p0608 | hypothetical protein                                                  | -    |
| RLPCCGM1_p0609 | hypothetical protein                                                  | -    |
| RLPCCGM1_p0611 | transposase                                                           | -    |
| RLPCCGM1_p0612 | transposase                                                           | -    |
| RLPCCGM1_p0627 | ABC transporter, permease protein                                     | -    |
| RLPCCGM1_p0628 | hypothetical protein                                                  | -    |
| RLPCCGM1_p0629 | hypothetical protein                                                  | -    |
| RLPCCGM1_p0630 | hypothetical protein                                                  | -    |
| RLPCCGM1_p0638 | hypothetical protein                                                  | -    |
| RLPCCGM1_p0639 | hypothetical protein                                                  | -    |
| RLPCCGM1_p0640 | hypothetical protein                                                  | -    |
| RLPCCGM1_p0658 | hypothetical protein                                                  | -    |
| RLPCCGM1_p0671 | transposase                                                           | -    |
| RLPCCGM1_p0685 | RNA-directed DNA polymerase RetA                                      | retA |
| RLPCCGM1_p0687 | heat shock protein 60 family chaperone GroEL                          | -    |
| RLPCCGM1_p0699 | FMN reductase                                                         | -    |
| RLPCCGM1_p0717 | transposase                                                           | -    |
| RLPCCGM1_p0718 | transposase                                                           | -    |
| RLPCCGM1_p0747 | nodZ protein                                                          | -    |

|                |                                                                     |       |
|----------------|---------------------------------------------------------------------|-------|
| RLPCCGM1_p0750 | 6-O-carbamoyl transferase                                           | -     |
| RLPCCGM1_p0756 | hypothetical protein                                                | -     |
| RLPCCGM1_p0757 | IS4 insertion sequence transposase protein                          | -     |
| RLPCCGM1_p0760 | hypothetical protein                                                | -     |
| RLPCCGM1_p0768 | insertion sequence transposase protein                              | -     |
| RLPCCGM1_p0769 | transposase                                                         | -     |
| RLPCCGM1_p0780 | hypothetical protein                                                | -     |
| RLPCCGM1_p0782 | hypothetical protein                                                | -     |
| RLPCCGM1_p0783 | insertion sequence transposase protein                              | -     |
| RLPCCGM1_p0784 | hypothetical protein                                                | -     |
| RLPCCGM1_p0785 | hypothetical protein                                                | -     |
| RLPCCGM1_p0787 | hypothetical protein                                                | -     |
| RLPCCGM1_p0811 | insertion sequence transposase protein, IS21/IS408/IS1162 family    | -     |
| RLPCCGM1_p0853 | hypothetical protein                                                | -     |
| RLPCCGM1_p0872 | hypothetical protein                                                | -     |
| RLPCCGM1_p0879 | hypothetical protein                                                | -     |
| RLPCCGM1_p0889 | multimeric flavodoxin WrbA                                          | -     |
| RLPCCGM1_p0930 | hypothetical protein                                                | -     |
| RLPCCGM1_p0965 | hypothetical protein                                                | -     |
| RLPCCGM1_p1014 | gamma-aminobutyratealpha-ketoglutarate aminotransferase             | -     |
| RLPCCGM1_p1015 | gamma-aminobutyratealpha-ketoglutarate aminotransferase             | -     |
| RLPCCGM1_p1018 | hypothetical protein                                                | -     |
| RLPCCGM1_p1042 | hypothetical protein                                                | -     |
| RLPCCGM1_p1043 | hypothetical protein                                                | -     |
| RLPCCGM1_p1044 | hypothetical protein                                                | -     |
| RLPCCGM1_p1045 | hypothetical protein                                                | -     |
| RLPCCGM1_p1150 | N-acetylglucosamine-1-phosphate uridyltransferase/Glucosamine-1-pho | -     |
| RLPCCGM1_p1158 | flagellar hook-length control protein FliK                          | -     |
| RLPCCGM1_p1166 | hypothetical protein                                                | -     |
| RLPCCGM1_p1167 | type IV secretion system protein VirD4                              | virD4 |
| RLPCCGM1_p1187 | hypothetical protein                                                | -     |
| RLPCCGM1_p1188 | hypothetical protein                                                | -     |
| RLPCCGM1_p1252 | hypothetical protein                                                | -     |
| RLPCCGM1_p1337 | hypothetical protein                                                | -     |
| RLPCCGM1_p1347 | hypothetical protein                                                | -     |
| RLPCCGM1_p1379 | RNA polymerase sigma-C factor                                       | -     |
| RLPCCGM1_p1380 | hypothetical protein                                                | -     |
| RLPCCGM1_p1393 | hypothetical protein                                                | -     |
| RLPCCGM1_p1395 | electron transfer flavoprotein, alpha subunit                       | -     |
| RLPCCGM1_p1435 | hypothetical protein                                                | -     |
| RLPCCGM1_p1512 | hypothetical protein                                                | -     |
| RLPCCGM1_p1513 | hypothetical protein                                                | -     |
| RLPCCGM1_p1524 | hypothetical protein                                                | -     |
| RLPCCGM1_p1525 | addiction module antitoxin                                          | -     |
| RLPCCGM1_p1534 | sugar phosphatase YfbT                                              | -     |
| RLPCCGM1_p1537 | TetR family transcriptional regulator                               | -     |
| RLPCCGM1_p1538 | short-chain dehydrogenase                                           | -     |
| RLPCCGM1_p1540 | syrB regulator                                                      | syrB  |
| RLPCCGM1_p1559 | amino acid ABC transporter substrate-binding protein                | -     |
| RLPCCGM1_p1605 | hypothetical protein                                                | -     |
| RLPCCGM1_p1679 | transposase                                                         | -     |
| RLPCCGM1_p1680 | major pilus subunit of type IV secretion complex (VirB2)            | -     |
| RLPCCGM1_p1697 | hypothetical protein                                                | -     |
| RLPCCGM1_p1708 | hypothetical protein                                                | -     |
| RLPCCGM1_p1710 | transporter protein                                                 | -     |



|                |                                                            |      |
|----------------|------------------------------------------------------------|------|
| RLPCCGM1_p1711 | hypothetical protein                                       | -    |
| RLPCCGM1_p1712 | hypothetical protein                                       | -    |
| RLPCCGM1_p1713 | hypothetical protein                                       | -    |
| RLPCCGM1_p1714 | XRE family transcriptional regulator                       | -    |
| RLPCCGM1_p1715 | transcriptional regulation                                 | -    |
| RLPCCGM1_p1716 | hypothetical protein                                       | -    |
| RLPCCGM1_p1717 | nopaline-binding periplasmic protein                       | nocT |
| RLPCCGM1_p1718 | opine ABC transporter permease                             | -    |
| RLPCCGM1_p1719 | nopaline transport system permease protein NocQ            | nocQ |
| RLPCCGM1_p1720 | LysR family transcriptional regulator                      | -    |
| RLPCCGM1_p1722 | hypothetical protein                                       | -    |
| RLPCCGM1_p1723 | hypothetical protein                                       | -    |
| RLPCCGM1_p1724 | hypothetical protein                                       | -    |
| RLPCCGM1_p1725 | hypothetical protein                                       | -    |
| RLPCCGM1_p1726 | hypothetical protein                                       | -    |
| RLPCCGM1_p1727 | membrane protein                                           | -    |
| RLPCCGM1_p1728 | hypothetical protein                                       | -    |
| RLPCCGM1_p1729 | hypothetical protein                                       | -    |
| RLPCCGM1_p1730 | hypothetical protein                                       | -    |
| RLPCCGM1_p1731 | FAD-dependent pyridine nucleotide-disulfide oxidoreductase | -    |
| RLPCCGM1_p1733 | hypothetical protein                                       | -    |
| RLPCCGM1_p1734 | hypothetical protein                                       | -    |
| RLPCCGM1_p1735 | hypothetical protein                                       | -    |
| RLPCCGM1_p1736 | ABC transporter integral membrane protein                  | -    |
| RLPCCGM1_p1737 | ABC transporter ATP-binding protein                        | -    |
| RLPCCGM1_p1738 | ABC transporter, permease protein                          | -    |
| RLPCCGM1_p1739 | lipoprotein                                                | -    |
| RLPCCGM1_p1740 | two component transcriptional regulator                    | -    |
| RLPCCGM1_p1741 | sensory histidine kinase QseC                              | qseC |
| RLPCCGM1_p1742 | phosphosugar isomerase                                     | -    |
| RLPCCGM1_p1743 | transmembrane protein                                      | -    |
| RLPCCGM1_p1744 | hypothetical protein                                       | -    |
| RLPCCGM1_p1745 | cyclopropane-fatty-acyl-phospholipid synthase              | cfa  |
| RLPCCGM1_p1747 | hypothetical protein                                       | -    |
| RLPCCGM1_p1748 | carboxylesterase                                           | -    |
| RLPCCGM1_p1749 | fatty acid desaturase                                      | -    |
| RLPCCGM1_p1750 | hypothetical protein                                       | -    |
| RLPCCGM1_p1751 | hypothetical protein                                       | -    |
| RLPCCGM1_p1752 | aminotransferase                                           | -    |
| RLPCCGM1_p1753 | phosphoserine phosphatase                                  | -    |
| RLPCCGM1_p1754 | sensory histidine kinase QseC                              | qseC |
| RLPCCGM1_p1755 | two component transcriptional regulator                    | qseB |
| RLPCCGM1_p1756 | hypothetical protein                                       | -    |
| RLPCCGM1_p1757 | hypothetical protein                                       | -    |
| RLPCCGM1_p1762 | GreA/GreB family elongation factor                         | -    |
| RLPCCGM1_p1763 | regulator of nucleoside diphosphate kinase                 | rnk  |
| RLPCCGM1_p1764 | LysR family transcriptional regulator                      | -    |
| RLPCCGM1_p1765 | alcohol dehydrogenase GroES-like protein                   | -    |
| RLPCCGM1_p1767 | signal peptide protein                                     | -    |
| RLPCCGM1_p1768 | cell division protein FtsH                                 | -    |
| RLPCCGM1_p1769 | hypothetical protein                                       | -    |
| RLPCCGM1_p1770 | hypothetical protein                                       | -    |
| RLPCCGM1_p1772 | hypothetical protein                                       | -    |
| RLPCCGM1_p1792 | hypothetical protein                                       | -    |
| RLPCCGM1_p1815 | hypothetical protein                                       | -    |

|                |                                                      |       |
|----------------|------------------------------------------------------|-------|
| RLPCCGM1_p1822 | hypothetical protein                                 | -     |
| RLPCCGM1_p1826 | hypothetical protein                                 | -     |
| RLPCCGM1_p1835 | hypothetical protein                                 | -     |
| RLPCCGM1_p1836 | transposase                                          | -     |
| RLPCCGM1_p1837 | hypothetical protein                                 | -     |
| RLPCCGM1_p1838 | IS3 family transposase                               | -     |
| RLPCCGM1_p1839 | transposase                                          | -     |
| RLPCCGM1_p1845 | hypothetical protein                                 | -     |
| RLPCCGM1_p1855 | hypothetical protein                                 | -     |
| RLPCCGM1_p1887 | RNA polymerase sigma-C factor                        | -     |
| RLPCCGM1_p1888 | hypothetical protein                                 | -     |
| RLPCCGM1_p1901 | insertion sequence transposase                       | -     |
| RLPCCGM1_p1902 | hypothetical protein                                 | -     |
| RLPCCGM1_p1904 | hypothetical protein                                 | -     |
| RLPCCGM1_p1915 | transposase                                          | -     |
| RLPCCGM1_p1942 | transmembrane protein                                | -     |
| RLPCCGM1_p1964 | hypothetical protein                                 | -     |
| RLPCCGM1_p2009 | allophanate hydrolase protein                        | -     |
| RLPCCGM1_p2010 | allophanate hydrolase                                | -     |
| RLPCCGM1_p2018 | transport secretion system IV protein, VirB2         | virB2 |
| RLPCCGM1_p2031 | adenylate/guanylate cyclase                          | -     |
| RLPCCGM1_p2075 | glycerate dehydrogenase                              | serA  |
| RLPCCGM1_p2076 | hypothetical protein                                 | -     |
| RLPCCGM1_p2102 | VapB protein (antitoxin to VapC)                     | -     |
| RLPCCGM1_p2103 | plasmid stability protein                            | -     |
| RLPCCGM1_p2125 | hypothetical protein                                 | -     |
| RLPCCGM1_p2139 | amino acid ABC transporter substrate-binding protein | -     |
| RLPCCGM1_p2140 | periplasmic binding protein                          | -     |
| RLPCCGM1_p2160 | ABC transporter permease protein                     | -     |
| RLPCCGM1_p2180 | UDP-galactose-lipid carrier transferase              | -     |
| RLPCCGM1_p2182 | hypothetical protein                                 | -     |
| RLPCCGM1_p2183 | hypothetical protein                                 | -     |
| RLPCCGM1_p2186 | transposase                                          | -     |

**Supplementary Table 3. Part B. Predicted CCGM7 CDS not shared with the *Sinorhizobium* group (*S. meliloti*, *S. medicae*, *S. fredii*).**

| CDS            | PREDICTED FUNCTION                                         | GENE NAME |
|----------------|------------------------------------------------------------|-----------|
| SAMCCGM7_c0005 | leucine-responsive regulatory protein                      | -         |
| SAMCCGM7_c0013 | ABC transporter, membrane spanning protein                 | -         |
| SAMCCGM7_c0015 | ferric enterobactin transport ATP-binding protein FepC     | fepC      |
| SAMCCGM7_c0016 | ABC transporter permease                                   | -         |
| SAMCCGM7_c0017 | ABC transporter                                            | -         |
| SAMCCGM7_c0019 | hypothetical protein                                       | -         |
| SAMCCGM7_c0025 | hypothetical protein                                       | -         |
| SAMCCGM7_c0027 | hypothetical protein                                       | -         |
| SAMCCGM7_c0029 | hypothetical protein                                       | -         |
| SAMCCGM7_c0032 | hypothetical protein                                       | -         |
| SAMCCGM7_c0034 | glutathione S-transferase                                  | -         |
| SAMCCGM7_c0035 | dehydrogenase/reductase oxidoreductase protein             | -         |
| SAMCCGM7_c0042 | hypothetical protein                                       | -         |
| SAMCCGM7_c0044 | general L-amino acid transport ATP-binding protein AapP    | aapP      |
| SAMCCGM7_c0045 | hypothetical protein                                       | -         |
| SAMCCGM7_c0046 | GntR family transcriptional regulator                      | -         |
| SAMCCGM7_c0047 | general L-amino acid transport system permease             | -         |
| SAMCCGM7_c0048 | glutamate Aspartate transport system permease protein GltJ | -         |

|                |                                                                             |      |
|----------------|-----------------------------------------------------------------------------|------|
| SAMCCGM7_c0049 | general L-amino acid-binding periplasmic protein AapJ                       | aapJ |
| SAMCCGM7_c0050 | hypothetical protein                                                        | -    |
| SAMCCGM7_c0051 | hypothetical protein                                                        | -    |
| SAMCCGM7_c0058 | oxidoreductase                                                              | -    |
| SAMCCGM7_c0064 | oligopeptide transport system permease protein OppB                         | -    |
| SAMCCGM7_c0065 | oligopeptide transport system permease protein OppB                         | -    |
| SAMCCGM7_c0073 | leucine-responsive regulatory protein                                       | lrp  |
| SAMCCGM7_c0074 | hypothetical protein                                                        | -    |
| SAMCCGM7_c0075 | leucine-responsive regulatory protein                                       | -    |
| SAMCCGM7_c0076 | hypothetical protein                                                        | -    |
| SAMCCGM7_c0077 | reductase                                                                   | -    |
| SAMCCGM7_c0079 | HTH-type transcriptional regulator TtuA                                     | ttuA |
| SAMCCGM7_c0080 | hypothetical protein                                                        | -    |
| SAMCCGM7_c0082 | hypothetical protein                                                        | -    |
| SAMCCGM7_c0086 | hypothetical protein                                                        | -    |
| SAMCCGM7_c0088 | hypothetical protein                                                        | -    |
| SAMCCGM7_c0095 | hypothetical protein                                                        | -    |
| SAMCCGM7_c0120 | kinase/phosphotransferase                                                   | -    |
| SAMCCGM7_c0124 | acetyltransferase                                                           | -    |
| SAMCCGM7_c0126 | dehydrogenase                                                               | -    |
| SAMCCGM7_c0127 | D-3-phosphoglycerate dehydrogenase                                          | -    |
| SAMCCGM7_c0129 | hypothetical protein                                                        | -    |
| SAMCCGM7_c0130 | aromatic hydrocarbon utilization transcriptional regulator CatR-LysR family | -    |
| SAMCCGM7_c0131 | transposase                                                                 | -    |
| SAMCCGM7_c0132 | transposase                                                                 | -    |
| SAMCCGM7_c0133 | transposase                                                                 | -    |
| SAMCCGM7_c0134 | L-ectoine synthase                                                          | ectC |
| SAMCCGM7_c0136 | transposase                                                                 | -    |
| SAMCCGM7_c0137 | transposase                                                                 | -    |
| SAMCCGM7_c0138 | transposase                                                                 | -    |
| SAMCCGM7_c0139 | hypothetical protein                                                        | -    |
| SAMCCGM7_c0152 | hypothetical protein                                                        | -    |
| SAMCCGM7_c0153 | cytochrome c                                                                | -    |
| SAMCCGM7_c0154 | imidazolonepropionase and amidohydrolase                                    | -    |
| SAMCCGM7_c0155 | amidohydrolase                                                              | -    |
| SAMCCGM7_c0156 | nodulation protein D                                                        | nodD |
| SAMCCGM7_c0157 | hypothetical protein                                                        | -    |
| SAMCCGM7_c0158 | AraC family transcriptional regulator protein                               | -    |
| SAMCCGM7_c0159 | hypothetical protein                                                        | -    |
| SAMCCGM7_c0160 | acyltransferase                                                             | nodA |
| SAMCCGM7_c0161 | nodulation protein N                                                        | nodN |
| SAMCCGM7_c0162 | hypothetical protein                                                        | -    |
| SAMCCGM7_c0163 | hypothetical protein                                                        | -    |
| SAMCCGM7_c0164 | hypothetical protein                                                        | -    |
| SAMCCGM7_c0165 | hypothetical protein                                                        | -    |
| SAMCCGM7_c0166 | hypothetical protein                                                        | -    |
| SAMCCGM7_c0167 | molybdopterin biosynthesis MoeB protein                                     | -    |
| SAMCCGM7_c0170 | ATP-dependent DNA ligase protein                                            | -    |
| SAMCCGM7_c0172 | transposase                                                                 | -    |
| SAMCCGM7_c0173 | hypothetical protein                                                        | -    |
| SAMCCGM7_c0175 | hypothetical protein                                                        | -    |
| SAMCCGM7_c0177 | hypothetical protein                                                        | -    |
| SAMCCGM7_c0178 | hypothetical protein                                                        | -    |
| SAMCCGM7_c0181 | hypothetical protein                                                        | -    |
| SAMCCGM7_c0182 | hypothetical protein                                                        | -    |
| SAMCCGM7_c0183 | methyltransferase                                                           | -    |
| SAMCCGM7_c0186 | nodulation protein D                                                        | nodD |
| SAMCCGM7_c0191 | nodulation protein O                                                        | nodO |
| SAMCCGM7_c0192 | hypothetical protein                                                        | -    |
| SAMCCGM7_c0194 | transposase                                                                 | -    |

|                |                                                                                     |   |
|----------------|-------------------------------------------------------------------------------------|---|
| SAMCCGM7_c0195 | hypothetical protein                                                                | - |
| SAMCCGM7_c0196 | short Chain                                                                         | - |
| SAMCCGM7_c0197 | hypothetical protein                                                                | - |
| SAMCCGM7_c0199 | hypothetical protein                                                                | - |
| SAMCCGM7_c0201 | hypothetical protein                                                                | - |
| SAMCCGM7_c0202 | bifunctional reductase protein                                                      | - |
| SAMCCGM7_c0203 | hypothetical protein                                                                | - |
| SAMCCGM7_c0204 | hypothetical protein                                                                | - |
| SAMCCGM7_c0205 | hypothetical protein                                                                | - |
| SAMCCGM7_c0206 | hypothetical protein                                                                | - |
| SAMCCGM7_c0207 | hypothetical protein                                                                | - |
| SAMCCGM7_c0208 | hypothetical protein                                                                | - |
| SAMCCGM7_c0209 | hypothetical protein                                                                | - |
| SAMCCGM7_c0210 | hypothetical protein                                                                | - |
| SAMCCGM7_c0217 | hypothetical protein                                                                | - |
| SAMCCGM7_c0218 | hypothetical protein                                                                | - |
| SAMCCGM7_c0219 | hypothetical protein                                                                | - |
| SAMCCGM7_c0220 | hypothetical protein                                                                | - |
| SAMCCGM7_c0221 | hypothetical protein                                                                | - |
| SAMCCGM7_c0224 | bacterial luciferase family protein YtmO, in cluster with L-cystine ABC transporter | - |
| SAMCCGM7_c0225 | coenzyme F420-dependent N5                                                          | - |
| SAMCCGM7_c0226 | hypothetical protein                                                                | - |
| SAMCCGM7_c0227 | hypothetical protein                                                                | - |
| SAMCCGM7_c0228 | hypothetical protein                                                                | - |
| SAMCCGM7_c0229 | GCN5 N-acetyltransferase                                                            | - |
| SAMCCGM7_c0230 | hypothetical protein                                                                | - |
| SAMCCGM7_c0231 | integrase                                                                           | - |
| SAMCCGM7_c0233 | hypothetical protein                                                                | - |
| SAMCCGM7_c0234 | hypothetical protein                                                                | - |
| SAMCCGM7_c0235 | hypothetical protein                                                                | - |
| SAMCCGM7_c0236 | glycine cleavage system transcriptional activator GcvA                              | - |
| SAMCCGM7_c0237 | hypothetical protein                                                                | - |
| SAMCCGM7_c0238 | transposase                                                                         | - |
| SAMCCGM7_c0239 | hypothetical protein                                                                | - |
| SAMCCGM7_c0241 | phenazine biosynthesis protein PhzF                                                 | - |
| SAMCCGM7_c0242 | hypothetical protein                                                                | - |
| SAMCCGM7_c0243 | hypothetical protein                                                                | - |
| SAMCCGM7_c0244 | Asp/Glu/Hydantoin racemase family protein                                           | - |
| SAMCCGM7_c0245 | hypothetical protein                                                                | - |
| SAMCCGM7_c0246 | hypothetical protein                                                                | - |
| SAMCCGM7_c0247 | ornithine cyclodeaminase                                                            | - |
| SAMCCGM7_c0248 | hypothetical protein                                                                | - |
| SAMCCGM7_c0249 | transposase                                                                         | - |
| SAMCCGM7_c0250 | transposase                                                                         | - |
| SAMCCGM7_c0251 | hypothetical protein                                                                | - |
| SAMCCGM7_c0253 | hypothetical protein                                                                | - |
| SAMCCGM7_c0258 | hypothetical protein                                                                | - |
| SAMCCGM7_c0270 | hypothetical protein                                                                | - |
| SAMCCGM7_c0293 | hypothetical protein                                                                | - |
| SAMCCGM7_c0295 | hypothetical protein                                                                | - |
| SAMCCGM7_c0307 | two component transcriptional regulator, winged helix family                        | - |
| SAMCCGM7_c0308 | two component regulatory protein                                                    | - |
| SAMCCGM7_c0336 | hypothetical protein                                                                | - |
| SAMCCGM7_c0342 | hypothetical protein                                                                | - |
| SAMCCGM7_c0360 | hypothetical protein                                                                | - |
| SAMCCGM7_c0411 | hypothetical protein                                                                | - |
| SAMCCGM7_c0449 | hypothetical protein                                                                | - |
| SAMCCGM7_c0458 | hypothetical protein                                                                | - |
| SAMCCGM7_c0472 | hypothetical protein                                                                | - |
| SAMCCGM7_c0512 | hypothetical protein                                                                | - |

|                |                                                                            |      |
|----------------|----------------------------------------------------------------------------|------|
| SAMCCGM7_c0527 | hypothetical protein                                                       | -    |
| SAMCCGM7_c0536 | hypothetical protein                                                       | -    |
| SAMCCGM7_c0551 | hypothetical protein                                                       | -    |
| SAMCCGM7_c0557 | hypothetical protein                                                       | -    |
| SAMCCGM7_c0579 | hypothetical protein                                                       | -    |
| SAMCCGM7_c0591 | hypothetical protein                                                       | -    |
| SAMCCGM7_c0593 | hypothetical protein                                                       | -    |
| SAMCCGM7_c0622 | hypothetical protein                                                       | -    |
| SAMCCGM7_c0627 | hypothetical protein                                                       | -    |
| SAMCCGM7_c0629 | glutathione-regulated potassium-efflux system protein                      | -    |
| SAMCCGM7_c0636 | hypothetical protein                                                       | -    |
| SAMCCGM7_c0639 | hypothetical protein                                                       | -    |
| SAMCCGM7_c0648 | hypothetical protein                                                       | -    |
| SAMCCGM7_c0656 | hypothetical protein                                                       | -    |
| SAMCCGM7_c0669 | hypothetical protein                                                       | -    |
| SAMCCGM7_c0680 | flagellar M-ring protein                                                   | fliF |
| SAMCCGM7_c0703 | hypothetical protein                                                       | -    |
| SAMCCGM7_c0741 | hypothetical protein                                                       | -    |
| SAMCCGM7_c0748 | hypothetical protein                                                       | -    |
| SAMCCGM7_c0764 | hypothetical protein                                                       | -    |
| SAMCCGM7_c0770 | hypothetical protein                                                       | -    |
| SAMCCGM7_c0771 | proline racemase                                                           | -    |
| SAMCCGM7_c0772 | L-proline glycine betaine binding ABC transporter protein ProX             | -    |
| SAMCCGM7_c0774 | hypothetical protein                                                       | -    |
| SAMCCGM7_c0783 | alcohol dehydrogenase class III                                            | adh  |
| SAMCCGM7_c0784 | dehydrogenase                                                              | -    |
| SAMCCGM7_c0792 | dipeptide-binding ABC transporter, periplasmic substrate-binding component | -    |
| SAMCCGM7_c0808 | hypothetical protein                                                       | -    |
| SAMCCGM7_c0812 | hypothetical protein                                                       | -    |
| SAMCCGM7_c0819 | hypothetical protein                                                       | -    |
| SAMCCGM7_c0823 | MFS permease                                                               | -    |
| SAMCCGM7_c0830 | dienelactone hydrolase family                                              | -    |
| SAMCCGM7_c0839 | hypothetical protein                                                       | -    |
| SAMCCGM7_c0906 | hypothetical protein                                                       | -    |
| SAMCCGM7_c0911 | hypothetical protein                                                       | -    |
| SAMCCGM7_c0934 | hypothetical protein                                                       | -    |
| SAMCCGM7_c0940 | hypothetical protein                                                       | -    |
| SAMCCGM7_c0947 | hypothetical protein                                                       | -    |
| SAMCCGM7_c0965 | acetyltransferase                                                          | -    |
| SAMCCGM7_c0967 | hypothetical protein                                                       | -    |
| SAMCCGM7_c0970 | hypothetical protein                                                       | -    |
| SAMCCGM7_c1000 | hypothetical protein                                                       | -    |
| SAMCCGM7_c1020 | hypothetical protein                                                       | -    |
| SAMCCGM7_c1030 | hypothetical protein                                                       | -    |
| SAMCCGM7_c1036 | hypothetical protein                                                       | -    |
| SAMCCGM7_c1066 | hypothetical protein                                                       | -    |
| SAMCCGM7_c1105 | hypothetical protein                                                       | -    |
| SAMCCGM7_c1161 | hypothetical protein                                                       | -    |
| SAMCCGM7_c1191 | hypothetical protein                                                       | -    |
| SAMCCGM7_c1192 | hypothetical protein                                                       | -    |
| SAMCCGM7_c1255 | hypothetical protein                                                       | -    |
| SAMCCGM7_c1263 | hypothetical protein                                                       | -    |
| SAMCCGM7_c1269 | glycerophosphoryl diester phosphodiesterase                                | -    |
| SAMCCGM7_c1274 | hypothetical protein                                                       | -    |
| SAMCCGM7_c1276 | N-Acetyl-D-glucosamine ABC transport system, sugar-binding protein         | -    |
| SAMCCGM7_c1285 | hypothetical protein                                                       | -    |
| SAMCCGM7_c1317 | universal stress protein UspA and nucleotide-binding protein               | -    |
| SAMCCGM7_c1325 | hypothetical protein                                                       | -    |
| SAMCCGM7_c1326 | nitric oxide reductase activation protein NorD                             | -    |
| SAMCCGM7_c1327 | 3-oxoacyl-(acyl-carrier protein) reductase                                 | -    |

|                |                                                              |      |
|----------------|--------------------------------------------------------------|------|
| SAMCCGM7_c1334 | IS4 transposase                                              | -    |
| SAMCCGM7_c1348 | ferredoxin-type protein NapF (periplasmic nitrate reductase) | -    |
| SAMCCGM7_c1353 | hypothetical protein                                         | -    |
| SAMCCGM7_c1368 | hypothetical protein                                         | -    |
| SAMCCGM7_c1382 | O-acetylhomoserine (thiol)-lyase                             | cysD |
| SAMCCGM7_c1385 | IclR family transcriptional regulator                        | -    |
| SAMCCGM7_c1387 | transposase                                                  | -    |
| SAMCCGM7_c1388 | helix-turn-helix, Fis-type                                   | -    |
| SAMCCGM7_c1389 | ABC transporter periplasmic protein                          | -    |
| SAMCCGM7_c1390 | D-dipeptide transport system permease protein DdpB           | ddpB |
| SAMCCGM7_c1391 | peptide ABC transporter permease                             | -    |
| SAMCCGM7_c1392 | hypothetical protein                                         | -    |
| SAMCCGM7_c1393 | oligopeptide transport ATP-binding protein OppD              | -    |
| SAMCCGM7_c1394 | dipeptide transport ATP-binding protein DppF                 | dppF |
| SAMCCGM7_c1396 | peptidase M14 carboxypeptidase A                             | -    |
| SAMCCGM7_c1398 | transposase                                                  | -    |
| SAMCCGM7_c1399 | enoyl-CoA hydratase/isomerase                                | -    |
| SAMCCGM7_c1400 | ATP-dependent AMP-binding family protein                     | -    |
| SAMCCGM7_c1402 | transposase                                                  | -    |
| SAMCCGM7_c1403 | transposase                                                  | -    |
| SAMCCGM7_c1418 | AsnC family transcriptional regulator                        | -    |
| SAMCCGM7_c1422 | glycerol-3-phosphate ABC transporter, permease protein UgpE  | -    |
| SAMCCGM7_c1425 | hypothetical protein                                         | -    |
| SAMCCGM7_c1448 | hypothetical protein                                         | -    |
| SAMCCGM7_c1465 | hypothetical protein                                         | -    |
| SAMCCGM7_c1474 | hypothetical protein                                         | -    |
| SAMCCGM7_c1510 | hypothetical protein                                         | -    |
| SAMCCGM7_c1519 | hypothetical protein                                         | -    |
| SAMCCGM7_c1520 | ferrichrome-iron transporter, receptor protein               | fhuA |
| SAMCCGM7_c1527 | hypothetical protein                                         | -    |
| SAMCCGM7_c1529 | hypothetical protein                                         | -    |
| SAMCCGM7_c1531 | hypothetical protein                                         | -    |
| SAMCCGM7_c1548 | hypothetical protein                                         | -    |
| SAMCCGM7_c1552 | hypothetical protein                                         | -    |
| SAMCCGM7_c1562 | 4-deoxy-L-threo-5-hexosulose-uronate ketol-isomerase         | -    |
| SAMCCGM7_c1607 | hypothetical protein                                         | -    |
| SAMCCGM7_c1619 | hypothetical protein                                         | -    |
| SAMCCGM7_c1620 | hypothetical protein                                         | -    |
| SAMCCGM7_c1638 | surface polysaccharides/antigen                              | -    |
| SAMCCGM7_c1640 | hypothetical protein                                         | -    |
| SAMCCGM7_c1656 | hypothetical protein                                         | -    |
| SAMCCGM7_c1694 | methyl-accepting chemotaxis protein                          | -    |
| SAMCCGM7_c1742 | glyoxalase                                                   | -    |
| SAMCCGM7_c1749 | hypothetical protein                                         | -    |
| SAMCCGM7_c1750 | hypothetical protein                                         | -    |
| SAMCCGM7_c1759 | hypothetical protein                                         | -    |
| SAMCCGM7_c1760 | hypothetical protein                                         | -    |
| SAMCCGM7_c1761 | hypothetical protein                                         | -    |
| SAMCCGM7_c1762 | hypothetical protein                                         | -    |
| SAMCCGM7_c1763 | IclR family transcriptional regulator                        | -    |
| SAMCCGM7_c1764 | hypothetical protein                                         | -    |
| SAMCCGM7_c1765 | catechol 1,2-dioxygenase                                     | -    |
| SAMCCGM7_c1766 | xylose isomerase domain-containing protein                   | -    |
| SAMCCGM7_c1768 | pyridoxine/pyridoxamine 5'-phosphate oxidase                 | pdxH |
| SAMCCGM7_c1769 | integral membrane protein                                    | -    |
| SAMCCGM7_c1770 | maleylacetate reductase                                      | tftE |
| SAMCCGM7_c1771 | hypothetical protein                                         | -    |
| SAMCCGM7_c1772 | hypothetical protein                                         | -    |
| SAMCCGM7_c1774 | D-amino acid dehydrogenase small subunit                     | -    |
| SAMCCGM7_c1775 | 3-dehydroquinate dehydratase                                 | -    |

|                |                                                                      |      |
|----------------|----------------------------------------------------------------------|------|
| SAMCCGM7_c1777 | 3-oxoacyl-(acyl-carrier protein) reductase                           | -    |
| SAMCCGM7_c1779 | xylose isomerase domain-containing protein                           | -    |
| SAMCCGM7_c1780 | hypothetical protein                                                 | -    |
| SAMCCGM7_c1781 | short-chain dehydrogenase/reductase SDR                              | -    |
| SAMCCGM7_c1782 | TetR family transcriptional regulator                                | -    |
| SAMCCGM7_c1797 | hypothetical protein                                                 | -    |
| SAMCCGM7_c1801 | hypothetical protein                                                 | -    |
| SAMCCGM7_c1813 | hydrolases or acyltransferases (alpha/beta hydrolase superfamily)    | -    |
| SAMCCGM7_c1817 | hypothetical protein                                                 | -    |
| SAMCCGM7_c1831 | hypothetical protein                                                 | -    |
| SAMCCGM7_c1832 | hypothetical protein                                                 | -    |
| SAMCCGM7_c1833 | hypothetical protein                                                 | -    |
| SAMCCGM7_c1835 | hypothetical protein                                                 | -    |
| SAMCCGM7_c1836 | hypothetical protein                                                 | -    |
| SAMCCGM7_c1837 | hypothetical protein                                                 | -    |
| SAMCCGM7_c1838 | hypothetical protein                                                 | -    |
| SAMCCGM7_c1839 | hypothetical protein                                                 | -    |
| SAMCCGM7_c1841 | 3-oxoacyl-(acyl-carrier protein) reductase                           | -    |
| SAMCCGM7_c1842 | hypothetical protein                                                 | -    |
| SAMCCGM7_c1844 | hypothetical protein                                                 | -    |
| SAMCCGM7_c1845 | methylase                                                            | -    |
| SAMCCGM7_c1846 | L-asparaginase                                                       | -    |
| SAMCCGM7_c1847 | adenylate cyclase                                                    | -    |
| SAMCCGM7_c1848 | hypothetical protein                                                 | -    |
| SAMCCGM7_c1849 | LuxR family transcriptional regulator                                | -    |
| SAMCCGM7_c1850 | transcriptional regulatory protein                                   | -    |
| SAMCCGM7_c1852 | metallo-beta-lactamase family protein                                | -    |
| SAMCCGM7_c1853 | hypothetical protein                                                 | -    |
| SAMCCGM7_c1855 | hypothetical protein                                                 | -    |
| SAMCCGM7_c1856 | hypothetical protein                                                 | -    |
| SAMCCGM7_c1857 | AraC family transcriptional regulator                                | -    |
| SAMCCGM7_c1862 | hypothetical protein                                                 | -    |
| SAMCCGM7_c1863 | hypothetical protein                                                 | -    |
| SAMCCGM7_c1865 | hypothetical protein                                                 | -    |
| SAMCCGM7_c1866 | NADPH-dependent FMN reductase                                        | -    |
| SAMCCGM7_c1867 | PadR family transcriptional regulator                                | -    |
| SAMCCGM7_c1868 | metallo-beta-lactamase family protein                                | -    |
| SAMCCGM7_c1870 | binding-protein-dependent transport systems inner membrane component | -    |
| SAMCCGM7_c1872 | taurine-binding periplasmic protein TauA                             | -    |
| SAMCCGM7_c1873 | hypothetical protein                                                 | -    |
| SAMCCGM7_c1874 | hypothetical protein                                                 | -    |
| SAMCCGM7_c1875 | hypothetical protein                                                 | -    |
| SAMCCGM7_c1876 | nucleoside-diphosphate-sugar epimerase                               | -    |
| SAMCCGM7_c1878 | hypothetical protein                                                 | -    |
| SAMCCGM7_c1880 | FAD-dependent oxidoreductase                                         | -    |
| SAMCCGM7_c1883 | choline dehydrogenase                                                | -    |
| SAMCCGM7_c1884 | hypothetical protein                                                 | -    |
| SAMCCGM7_c1885 | hypothetical protein                                                 | -    |
| SAMCCGM7_c1886 | hypothetical protein                                                 | -    |
| SAMCCGM7_c1887 | xylose isomerase domain-containing protein                           | -    |
| SAMCCGM7_c1894 | hypothetical protein                                                 | -    |
| SAMCCGM7_c1896 | pyruvate carboxyl transferase                                        | -    |
| SAMCCGM7_c1897 | mimosine-binding periplasmic protein                                 | -    |
| SAMCCGM7_c1898 | hypothetical protein                                                 | -    |
| SAMCCGM7_c1899 | polar amino acid ABC transporter, inner membrane subunit             | -    |
| SAMCCGM7_c1901 | cystathionine beta-lyase PatB                                        | patB |
| SAMCCGM7_c1902 | endoribonuclease L-PSP                                               | -    |
| SAMCCGM7_c1903 | D-cysteine desulfhydrase                                             | dcyD |
| SAMCCGM7_c1904 | alkyl hydroperoxide reductase subunit C                              | ahpC |
| SAMCCGM7_c1905 | alkyl hydroperoxide reductase protein F                              | -    |

|                |                                                                        |      |
|----------------|------------------------------------------------------------------------|------|
| SAMCCGM7_c1906 | alkyl hydroperoxide reductase protein F                                | -    |
| SAMCCGM7_c1907 | alkyl hydroperoxide reductase protein F                                | -    |
| SAMCCGM7_c1908 | transcription regulator                                                | -    |
| SAMCCGM7_c1909 | AraC family transcriptional regulator                                  | -    |
| SAMCCGM7_c1910 | iron-chelator utilization protein                                      | -    |
| SAMCCGM7_c1911 | transport protein permease                                             | -    |
| SAMCCGM7_c1912 | hypothetical protein                                                   | -    |
| SAMCCGM7_c1913 | hypothetical protein                                                   | -    |
| SAMCCGM7_c1915 | 4-hydroxyphenylacetate 3-monooxygenase, reductase component            | hpaC |
| SAMCCGM7_c1916 | hypothetical protein                                                   | -    |
| SAMCCGM7_c1919 | periplasmic binding protein                                            | -    |
| SAMCCGM7_c1920 | ABC-type sugar transport system, permease component                    | -    |
| SAMCCGM7_c1921 | ABC transporter, permease protein                                      | -    |
| SAMCCGM7_c1922 | sugar dehydrogenase                                                    | -    |
| SAMCCGM7_c1923 | trehalose import ATP-binding protein SugC                              | sugC |
| SAMCCGM7_c1924 | chemoreceptor protein                                                  | -    |
| SAMCCGM7_c1926 | HAD-superfamily hydrolase                                              | -    |
| SAMCCGM7_c1927 | hypothetical protein                                                   | -    |
| SAMCCGM7_c1929 | DegT/DnrJ/EryC1/StrS aminotransferase                                  | -    |
| SAMCCGM7_c1930 | ROK family protein                                                     | -    |
| SAMCCGM7_c1931 | hypothetical protein                                                   | -    |
| SAMCCGM7_c1932 | nodulation protein O                                                   | nodO |
| SAMCCGM7_c1933 | Lactococcin-G-processing and transport ATP-binding protein LagD        | lagD |
| SAMCCGM7_c1934 | protein secretion protein, HlyD family                                 | -    |
| SAMCCGM7_c1935 | hypothetical protein                                                   | -    |
| SAMCCGM7_c1936 | hypothetical protein                                                   | -    |
| SAMCCGM7_c1937 | dipeptidyl peptidase IV                                                | -    |
| SAMCCGM7_c1938 | hypothetical protein                                                   | -    |
| SAMCCGM7_c1941 | membrane-fusion protein                                                | -    |
| SAMCCGM7_c1943 | trehalose synthase                                                     | treT |
| SAMCCGM7_c1944 | phosphatase                                                            | -    |
| SAMCCGM7_c1945 | aminotransferase                                                       | -    |
| SAMCCGM7_c1946 | paromamine 6'-oxidase                                                  | neoG |
| SAMCCGM7_c1947 | hypothetical protein                                                   | -    |
| SAMCCGM7_c1948 | modular protein                                                        | -    |
| SAMCCGM7_c1951 | chromate transporter protein                                           | -    |
| SAMCCGM7_c1952 | coproporphyrinogen III oxidase                                         | hemN |
| SAMCCGM7_c1953 | uptake hydrogenase small subunit                                       | hupS |
| SAMCCGM7_c1954 | uptake hydrogenase large subunit                                       | hupL |
| SAMCCGM7_c1955 | Ni/Fe-hydrogenase, 1 b-type cytochrome subunit                         | hupC |
| SAMCCGM7_c1956 | hydrogenase maturation                                                 | hupD |
| SAMCCGM7_c1957 | hydrogenase expression/formation                                       | hupF |
| SAMCCGM7_c1958 | hypothetical protein                                                   | -    |
| SAMCCGM7_c1959 | hydrogenase expression/formation                                       | hupH |
| SAMCCGM7_c1960 | rubredoxin-type Fe(Cys) <sub>4</sub> protein                           | -    |
| SAMCCGM7_c1961 | hydrogenase expression/formation                                       | hupJ |
| SAMCCGM7_c1962 | hydrogenase expression/formation                                       | hupK |
| SAMCCGM7_c1963 | hydrogenase expression/formation                                       | hypA |
| SAMCCGM7_c1964 | hypothetical protein                                                   | -    |
| SAMCCGM7_c1965 | hydrogenase nickel incorporation                                       | hypB |
| SAMCCGM7_c1966 | carbamoyl phosphate phosphatase, (NiFe) hydrogenase maturation protein | hypF |
| SAMCCGM7_c1967 | hydrogenase expression/formation                                       | hypC |
| SAMCCGM7_c1968 | hydrogenase expression/formation                                       | hypD |
| SAMCCGM7_c1969 | hydrogenase maturation                                                 | hypE |
| SAMCCGM7_c1971 | hypothetical protein                                                   | -    |
| SAMCCGM7_c1972 | amidase                                                                | -    |
| SAMCCGM7_c1975 | hypothetical protein                                                   | -    |
| SAMCCGM7_c1977 | aspartate ammonia-lyase                                                | aspA |
| SAMCCGM7_c1978 | succinate-semialdehyde dehydrogenase (NADP+)                           | -    |
| SAMCCGM7_c1982 | AsnC family alanine catabolic operon transcriptional regulator         | dadR |



|                |                                                                                  |      |
|----------------|----------------------------------------------------------------------------------|------|
| SAMCCGM7_c1983 | AsnC family transcriptional regulator                                            | -    |
| SAMCCGM7_c1984 | acetylornithine deacetylase                                                      | -    |
| SAMCCGM7_c1986 | glutamine transport system permease protein GlnP                                 | glnP |
| SAMCCGM7_c1987 | glutamine transport ATP-binding protein GlnQ                                     | glnQ |
| SAMCCGM7_c1989 | hypothetical protein                                                             | -    |
| SAMCCGM7_c1993 | hypothetical protein                                                             | -    |
| SAMCCGM7_c1996 | hypothetical protein                                                             | -    |
| SAMCCGM7_c1997 | hypothetical protein                                                             | -    |
| SAMCCGM7_c1998 | AraC family transcriptional regulator                                            | -    |
| SAMCCGM7_c1999 | major facilitator superfamily permease                                           | -    |
| SAMCCGM7_c2000 | hypothetical protein                                                             | -    |
| SAMCCGM7_c2003 | nodulation protein D                                                             | nodD |
| SAMCCGM7_c2004 | hypothetical protein                                                             | -    |
| SAMCCGM7_c2005 | hypothetical protein                                                             | -    |
| SAMCCGM7_c2006 | hypothetical protein                                                             | -    |
| SAMCCGM7_c2007 | hypothetical protein                                                             | -    |
| SAMCCGM7_c2008 | acyltransferase                                                                  | -    |
| SAMCCGM7_c2009 | hypothetical protein                                                             | -    |
| SAMCCGM7_c2010 | acyltransferase                                                                  | -    |
| SAMCCGM7_c2019 | resolvase/Integrase TinR protein                                                 | -    |
| SAMCCGM7_c2020 | hypothetical protein                                                             | -    |
| SAMCCGM7_c2021 | hypothetical protein                                                             | -    |
| SAMCCGM7_c2022 | hypothetical protein                                                             | -    |
| SAMCCGM7_c2023 | hypothetical protein                                                             | -    |
| SAMCCGM7_c2024 | transposase                                                                      | -    |
| SAMCCGM7_c2025 | hypothetical protein                                                             | -    |
| SAMCCGM7_c2026 | hypothetical protein                                                             | -    |
| SAMCCGM7_c2028 | phosphopantetheinyl transferase                                                  | -    |
| SAMCCGM7_c2029 | efflux protein, MATE family                                                      | -    |
| SAMCCGM7_c2030 | long-chain-fatty-acid--CoA ligase                                                | -    |
| SAMCCGM7_c2031 | aerobic C4-dicarboxylate transporter for fumarate, L-malate, D-malate, succinate | -    |
| SAMCCGM7_c2032 | AraC family transcriptional regulator                                            | -    |
| SAMCCGM7_c2040 | two-component sensor histidine kinase                                            | -    |
| SAMCCGM7_c2041 | hypothetical protein                                                             | -    |
| SAMCCGM7_c2042 | hypothetical protein                                                             | -    |
| SAMCCGM7_c2047 | hypothetical protein                                                             | -    |
| SAMCCGM7_c2048 | transposase number 1 for insertion sequence NGRIS-16h                            | -    |
| SAMCCGM7_c2054 | hypothetical protein                                                             | -    |
| SAMCCGM7_c2060 | hypothetical protein                                                             | -    |
| SAMCCGM7_c2069 | peptide ABC transporter                                                          | -    |
| SAMCCGM7_c2075 | hypothetical protein                                                             | -    |
| SAMCCGM7_c2076 | hypothetical protein                                                             | -    |
| SAMCCGM7_c2078 | transposase                                                                      | -    |
| SAMCCGM7_c2080 | hypothetical protein                                                             | -    |
| SAMCCGM7_c2081 | hypothetical protein                                                             | -    |
| SAMCCGM7_c2082 | hypothetical protein                                                             | -    |
| SAMCCGM7_c2083 | methyltransferase type 11                                                        | -    |
| SAMCCGM7_c2085 | 3-oxoacyl-(acyl-carrier-protein)                                                 | -    |
| SAMCCGM7_c2087 | hypothetical protein                                                             | -    |
| SAMCCGM7_c2089 | D-amino acid oxidase protein                                                     | -    |
| SAMCCGM7_c2090 | D-amino acid oxidase protein                                                     | -    |
| SAMCCGM7_c2091 | hypothetical protein                                                             | -    |
| SAMCCGM7_c2092 | ArsR family transcriptional regulator                                            | -    |
| SAMCCGM7_c2097 | hypothetical protein                                                             | -    |
| SAMCCGM7_c2098 | hypothetical protein                                                             | -    |
| SAMCCGM7_c2102 | hypothetical protein                                                             | -    |
| SAMCCGM7_c2103 | hypothetical protein                                                             | -    |
| SAMCCGM7_c2104 | hypothetical protein                                                             | -    |
| SAMCCGM7_c2105 | LysR family transcriptional regulator                                            | -    |
| SAMCCGM7_c2106 | alkyl sulfatase beta-lactamase family protein                                    | -    |

|                |                                                                         |      |
|----------------|-------------------------------------------------------------------------|------|
| SAMCCGM7_c2107 | hypothetical protein                                                    | -    |
| SAMCCGM7_c2108 | hypothetical protein                                                    | -    |
| SAMCCGM7_c2110 | pyridoxamine 5'-phosphate oxidase                                       | -    |
| SAMCCGM7_c2111 | hypothetical protein                                                    | -    |
| SAMCCGM7_c2113 | short-chain dehydrogenase/reductase SDR                                 | -    |
| SAMCCGM7_c2116 | hypothetical protein                                                    | -    |
| SAMCCGM7_c2117 | plasmid stabilization protein                                           | -    |
| SAMCCGM7_c2118 | hypothetical protein                                                    | -    |
| SAMCCGM7_c2119 | ParB domain protein nuclease                                            | -    |
| SAMCCGM7_c2120 | hypothetical protein                                                    | -    |
| SAMCCGM7_c2121 | hypothetical protein                                                    | -    |
| SAMCCGM7_c2125 | filamentation protein                                                   | -    |
| SAMCCGM7_c2126 | filamentation protein                                                   | -    |
| SAMCCGM7_c2127 | filamentation protein                                                   | -    |
| SAMCCGM7_c2132 | hypothetical protein                                                    | -    |
| SAMCCGM7_c2139 | hypothetical protein                                                    | -    |
| SAMCCGM7_c2140 | hypothetical protein                                                    | -    |
| SAMCCGM7_c2141 | hypothetical protein                                                    | -    |
| SAMCCGM7_c2142 | hypothetical protein                                                    | -    |
| SAMCCGM7_c2143 | hypothetical protein                                                    | -    |
| SAMCCGM7_c2145 | spermidine/putrescine import ATP-binding protein PotA                   | potA |
| SAMCCGM7_c2146 | ABC transporter permease component                                      | -    |
| SAMCCGM7_c2147 | putrescine transport system permease protein PotH                       | -    |
| SAMCCGM7_c2148 | ABC transporter, periplasmic spermidine putrescine-binding protein PotD | -    |
| SAMCCGM7_c2149 | HTH-type transcriptional regulator DgdR                                 | -    |
| SAMCCGM7_c2150 | creatinine amidohydrolase                                               | crnA |
| SAMCCGM7_c2151 | hypothetical protein                                                    | -    |
| SAMCCGM7_c2152 | hypothetical protein                                                    | -    |
| SAMCCGM7_c2163 | hypothetical protein                                                    | -    |
| SAMCCGM7_c2165 | hypothetical protein                                                    | -    |
| SAMCCGM7_c2166 | hypothetical protein                                                    | -    |
| SAMCCGM7_c2167 | hypothetical protein                                                    | -    |
| SAMCCGM7_c2168 | heat shock protein 70                                                   | -    |
| SAMCCGM7_c2170 | hypothetical protein                                                    | -    |
| SAMCCGM7_c2171 | hypothetical protein                                                    | -    |
| SAMCCGM7_c2176 | hypothetical protein                                                    | -    |
| SAMCCGM7_c2178 | transposase                                                             | -    |
| SAMCCGM7_c2179 | phage DNA invertase                                                     | -    |
| SAMCCGM7_c2180 | DNA-invertase                                                           | -    |
| SAMCCGM7_c2181 | hypothetical protein                                                    | -    |
| SAMCCGM7_c2182 | hypothetical protein                                                    | -    |
| SAMCCGM7_c2184 | nucleotidyltransferase                                                  | -    |
| SAMCCGM7_c2196 | nucleoside-diphosphate-sugar epimerase                                  | -    |
| SAMCCGM7_c2206 | hypothetical protein                                                    | -    |
| SAMCCGM7_c2208 | hypothetical protein                                                    | -    |
| SAMCCGM7_c2212 | 4-hydroxyphenylpyruvate dioxygenase                                     | -    |
| SAMCCGM7_c2241 | hypothetical protein                                                    | -    |
| SAMCCGM7_c2243 | hypothetical protein                                                    | -    |
| SAMCCGM7_c2245 | hypothetical protein                                                    | -    |
| SAMCCGM7_c2258 | hypothetical protein                                                    | -    |
| SAMCCGM7_c2259 | glutathione S-transferase                                               | -    |
| SAMCCGM7_c2260 | hypothetical protein                                                    | -    |
| SAMCCGM7_c2265 | hypothetical protein                                                    | -    |
| SAMCCGM7_c2272 | hypothetical protein                                                    | -    |
| SAMCCGM7_c2278 | hypothetical protein                                                    | -    |
| SAMCCGM7_c2281 | hypothetical protein                                                    | -    |
| SAMCCGM7_c2298 | hypothetical protein                                                    | -    |
| SAMCCGM7_c2301 | hydrolase of the alpha/beta superfamily                                 | -    |
| SAMCCGM7_c2303 | hypothetical protein                                                    | -    |
| SAMCCGM7_c2304 | IS4 insertion sequence transposase                                      | -    |

|                |                                                                  |      |
|----------------|------------------------------------------------------------------|------|
| SAMCCGM7_c2305 | aminoglycoside N3-acetyltransferase                              | aacC |
| SAMCCGM7_c2314 | hypothetical protein                                             | -    |
| SAMCCGM7_c2316 | nuclease (thermonuclease) protein                                | -    |
| SAMCCGM7_c2332 | hypothetical protein                                             | -    |
| SAMCCGM7_c2334 | proline racemase                                                 | -    |
| SAMCCGM7_c2335 | hypothetical protein                                             | -    |
| SAMCCGM7_c2339 | glycine betaine/L-proline transport system permease protein ProW | proW |
| SAMCCGM7_c2342 | L-proline glycine betaine binding ABC transporter protein ProX   | -    |
| SAMCCGM7_c2343 | 3-oxoacyl-(acyl-carrier protein) reductase                       | -    |
| SAMCCGM7_c2344 | 4-hydroxy-tetrahydrodipicolinate synthase 1                      | dapA |
| SAMCCGM7_c2345 | oxidoreductase protein                                           | -    |
| SAMCCGM7_c2346 | hypothetical protein                                             | -    |
| SAMCCGM7_c2347 | transcriptional regulator                                        | -    |
| SAMCCGM7_c2348 | pyridoxamine 5'-phosphate oxidase-like FMN-binding protein       | -    |
| SAMCCGM7_c2349 | hypothetical protein                                             | -    |
| SAMCCGM7_c2351 | hypothetical protein                                             | -    |
| SAMCCGM7_c2354 | hypothetical protein                                             | -    |
| SAMCCGM7_c2356 | GNAT family acetyltransferase                                    | -    |
| SAMCCGM7_c2357 | Na <sup>+</sup> /H <sup>+</sup> antiporter protein               | -    |
| SAMCCGM7_c2358 | hypothetical protein                                             | -    |
| SAMCCGM7_c2361 | hypothetical protein                                             | -    |
| SAMCCGM7_c2362 | hypothetical protein                                             | -    |
| SAMCCGM7_c2403 | hypothetical protein                                             | -    |
| SAMCCGM7_c2414 | serine/threonine-protein kinase                                  | -    |
| SAMCCGM7_c2415 | hypothetical protein                                             | -    |
| SAMCCGM7_c2416 | hypothetical protein                                             | -    |
| SAMCCGM7_c2417 | outer membrane protein                                           | -    |
| SAMCCGM7_c2418 | hypothetical protein                                             | -    |
| SAMCCGM7_c2419 | FHA domain protein                                               | -    |
| SAMCCGM7_c2420 | hypothetical protein                                             | -    |
| SAMCCGM7_c2421 | hypothetical protein                                             | -    |
| SAMCCGM7_c2422 | hypothetical protein                                             | -    |
| SAMCCGM7_c2423 | protein of avirulence locus ImpE                                 | impE |
| SAMCCGM7_c2424 | hypothetical protein                                             | -    |
| SAMCCGM7_c2425 | hypothetical protein                                             | -    |
| SAMCCGM7_c2426 | hypothetical protein                                             | -    |
| SAMCCGM7_c2427 | ImpA protein                                                     | -    |
| SAMCCGM7_c2429 | cytoplasmic protein                                              | -    |
| SAMCCGM7_c2430 | transmembrane protein                                            | -    |
| SAMCCGM7_c2431 | hypothetical protein                                             | -    |
| SAMCCGM7_c2432 | fimbrial operon protein                                          | -    |
| SAMCCGM7_c2434 | hypothetical protein                                             | -    |
| SAMCCGM7_c2435 | hypothetical protein                                             | -    |
| SAMCCGM7_c2436 | hypothetical protein                                             | -    |
| SAMCCGM7_c2437 | hypothetical protein                                             | -    |
| SAMCCGM7_c2471 | hypothetical protein                                             | -    |
| SAMCCGM7_c2490 | gamma-aminobutyrate:alpha-ketoglutarate aminotransferase         | -    |
| SAMCCGM7_c2492 | transposase                                                      | -    |
| SAMCCGM7_c2514 | hypothetical protein                                             | -    |
| SAMCCGM7_c2522 | hypothetical protein                                             | -    |
| SAMCCGM7_c2523 | hypothetical protein                                             | -    |
| SAMCCGM7_c2525 | hypothetical protein                                             | -    |
| SAMCCGM7_c2527 | type I secretion system membrane fusion protein PrsE             | prsE |
| SAMCCGM7_c2528 | alkaline protease secretion ATP-binding protein AprD             | aprD |
| SAMCCGM7_c2530 | hypothetical protein                                             | -    |
| SAMCCGM7_c2531 | 5'-nucleotidase SurE                                             | surE |
| SAMCCGM7_c2532 | FAD dependent oxidoreductase                                     | -    |
| SAMCCGM7_c2533 | short-chain dehydrogenase                                        | -    |
| SAMCCGM7_c2534 | saccharopine dehydrogenase                                       | -    |
| SAMCCGM7_c2535 | hypothetical protein                                             | -    |

|                |                                                  |      |
|----------------|--------------------------------------------------|------|
| SAMCCGM7_c2536 | hypothetical protein                             | -    |
| SAMCCGM7_c2537 | hypothetical protein                             | -    |
| SAMCCGM7_c2538 | TetR family transcriptional regulator            | -    |
| SAMCCGM7_c2539 | hypothetical protein                             | -    |
| SAMCCGM7_c2540 | hypothetical protein                             | -    |
| SAMCCGM7_c2541 | 3-keto-5-aminohexanoate cleavage enzyme          | kce  |
| SAMCCGM7_c2542 | hypothetical protein                             | -    |
| SAMCCGM7_c2547 | ABC transporter permease                         | -    |
| SAMCCGM7_c2548 | ABC transporter permease                         | -    |
| SAMCCGM7_c2557 | branched chain amino acid ABC transporter ATPase | livF |
| SAMCCGM7_c2559 | hypothetical protein                             | -    |
| SAMCCGM7_c2566 | NAD(P)H-flavin oxidoreductase                    | -    |
| SAMCCGM7_c2567 | shikimate kinase                                 | aroK |
| SAMCCGM7_c2568 | hypothetical protein                             | -    |
| SAMCCGM7_c2571 | transposase                                      | -    |
| SAMCCGM7_c2572 | transposase                                      | -    |
| SAMCCGM7_c2573 | transposase                                      | -    |
| SAMCCGM7_c2576 | ATP-dependent DNA ligase protein                 | -    |
| SAMCCGM7_c2578 | hypothetical protein                             | -    |
| SAMCCGM7_c2579 | hypothetical protein                             | -    |
| SAMCCGM7_c2583 | hypothetical protein                             | -    |
| SAMCCGM7_c2586 | AraC family transcriptional regulator            | -    |
| SAMCCGM7_c2587 | hypothetical protein                             | -    |
| SAMCCGM7_c2590 | hypothetical protein                             | -    |
| SAMCCGM7_c2591 | hypothetical protein                             | -    |
| SAMCCGM7_c2592 | hypothetical protein                             | -    |
| SAMCCGM7_c2593 | hypothetical protein                             | -    |
| SAMCCGM7_c2594 | hypothetical protein                             | -    |
| SAMCCGM7_c2597 | hypothetical protein                             | -    |
| SAMCCGM7_c2621 | OmpA/MotB domain protein                         | -    |
| SAMCCGM7_c2629 | hypothetical protein                             | -    |
| SAMCCGM7_c2630 | hypothetical protein                             | -    |
| SAMCCGM7_c2632 | activator of ProP osmoprotectant transporter     | -    |
| SAMCCGM7_c2636 | hypothetical protein                             | -    |
| SAMCCGM7_c2637 | hypothetical protein                             | -    |
| SAMCCGM7_c2645 | hypothetical protein                             | -    |
| SAMCCGM7_c2646 | hypothetical protein                             | -    |
| SAMCCGM7_c2648 | ATP-dependent DNA ligase protein                 | -    |
| SAMCCGM7_c2652 | hypothetical protein                             | -    |
| SAMCCGM7_c2654 | hypothetical protein                             | -    |
| SAMCCGM7_c2655 | hypothetical protein                             | -    |
| SAMCCGM7_c2656 | hypothetical protein                             | -    |
| SAMCCGM7_c2657 | hypothetical protein                             | -    |
| SAMCCGM7_c2658 | oxidoreductase                                   | -    |
| SAMCCGM7_c2659 | adenylate/guanylate cyclase                      | -    |
| SAMCCGM7_c2660 | Crp/FNR family transcriptional regulator         | -    |
| SAMCCGM7_c2661 | hypothetical protein                             | -    |
| SAMCCGM7_c2662 | hypothetical protein                             | -    |
| SAMCCGM7_c2674 | capsule polysaccharide export protein            | -    |
| SAMCCGM7_c2675 | hypothetical protein                             | -    |
| SAMCCGM7_c2678 | filamentation induced by cAMP protein Fic        | -    |
| SAMCCGM7_c2679 | transposase                                      | -    |
| SAMCCGM7_c2680 | filamentation induced by cAMP protein Fic        | -    |
| SAMCCGM7_c2682 | hypothetical protein                             | -    |
| SAMCCGM7_c2683 | hypothetical protein                             | -    |
| SAMCCGM7_c2684 | hypothetical protein                             | -    |
| SAMCCGM7_c2685 | hypothetical protein                             | -    |
| SAMCCGM7_c2700 | hypothetical protein                             | -    |
| SAMCCGM7_c2704 | hypothetical protein                             | -    |
| SAMCCGM7_c2708 | hypothetical protein                             | -    |

|                |                                                                |      |
|----------------|----------------------------------------------------------------|------|
| SAMCCGM7_c2709 | hypothetical protein                                           | -    |
| SAMCCGM7_c2711 | IS66 insertion sequence transposase                            | -    |
| SAMCCGM7_c2713 | transposase                                                    | -    |
| SAMCCGM7_c2716 | hypothetical protein                                           | -    |
| SAMCCGM7_c2720 | hypothetical protein                                           | -    |
| SAMCCGM7_c2727 | hypothetical protein                                           | -    |
| SAMCCGM7_c2729 | hypothetical protein                                           | -    |
| SAMCCGM7_c2734 | hypothetical protein                                           | -    |
| SAMCCGM7_c2740 | hypothetical protein                                           | -    |
| SAMCCGM7_c2743 | hypothetical protein                                           | -    |
| SAMCCGM7_c2744 | hypothetical protein                                           | -    |
| SAMCCGM7_c2745 | hypothetical protein                                           | -    |
| SAMCCGM7_c2750 | hypothetical protein                                           | -    |
| SAMCCGM7_c2762 | hypothetical protein                                           | -    |
| SAMCCGM7_c2787 | hypothetical protein                                           | -    |
| SAMCCGM7_c2808 | hypothetical protein                                           | -    |
| SAMCCGM7_c2809 | hypothetical protein                                           | -    |
| SAMCCGM7_c2823 | hypothetical protein                                           | -    |
| SAMCCGM7_c2872 | hypothetical protein                                           | -    |
| SAMCCGM7_c2882 | hypothetical protein                                           | -    |
| SAMCCGM7_c2894 | hypothetical protein                                           | -    |
| SAMCCGM7_c2904 | hypothetical protein                                           | -    |
| SAMCCGM7_c2914 | hypothetical protein                                           | -    |
| SAMCCGM7_c2941 | lipoyl synthase                                                | lipA |
| SAMCCGM7_c2999 | hypothetical protein                                           | -    |
| SAMCCGM7_c3017 | tetracycline efflux protein TetA                               | -    |
| SAMCCGM7_c3018 | tetracycline efflux protein TetA                               | -    |
| SAMCCGM7_c3036 | hypothetical protein                                           | -    |
| SAMCCGM7_c3042 | amidase                                                        | -    |
| SAMCCGM7_c3108 | hypothetical protein                                           | -    |
| SAMCCGM7_c3140 | glucosamine--fructose-6-phosphate aminotransferase             | -    |
| SAMCCGM7_c3141 | C4-dicarboxylate transport protein                             | -    |
| SAMCCGM7_c3150 | aquaporin Z                                                    | -    |
| SAMCCGM7_c3151 | aquaporin Z                                                    | -    |
| SAMCCGM7_c3159 | hypothetical protein                                           | -    |
| SAMCCGM7_c3163 | Lacl family transcriptional regulator                          | -    |
| SAMCCGM7_c3164 | hypothetical protein                                           | -    |
| SAMCCGM7_c3165 | sugar ABC transporter permease                                 | -    |
| SAMCCGM7_c3166 | sn-glycerol-3-phosphate transport system permease protein UgpA | ugpA |
| SAMCCGM7_c3167 | sn-glycerol-3-phosphate import ATP-binding protein UgpC        | ugpC |
| SAMCCGM7_c3168 | hypothetical protein                                           | -    |
| SAMCCGM7_c3170 | hypothetical protein                                           | -    |
| SAMCCGM7_c3189 | hypothetical protein                                           | -    |
| SAMCCGM7_c3195 | hypothetical protein                                           | -    |
| SAMCCGM7_c3196 | hypothetical protein                                           | -    |
| SAMCCGM7_c3197 | hypothetical protein                                           | -    |
| SAMCCGM7_c3201 | hypothetical protein                                           | -    |
| SAMCCGM7_c3217 | hypothetical protein                                           | -    |
| SAMCCGM7_c3241 | hypothetical protein                                           | -    |
| SAMCCGM7_c3255 | hypothetical protein                                           | -    |
| SAMCCGM7_c3260 | hypothetical protein                                           | -    |
| SAMCCGM7_c3269 | hypothetical protein                                           | -    |
| SAMCCGM7_c3293 | hypothetical protein                                           | -    |
| SAMCCGM7_c3301 | hypothetical protein                                           | -    |
| SAMCCGM7_c3309 | hypothetical protein                                           | -    |
| SAMCCGM7_c3320 | hypothetical protein                                           | -    |
| SAMCCGM7_c3333 | hypothetical protein                                           | -    |
| SAMCCGM7_c3351 | hypothetical protein                                           | -    |
| SAMCCGM7_c3352 | low-specificity L-threonine aldolase                           | -    |
| SAMCCGM7_c3353 | hypothetical protein                                           | -    |

|                |                                                                                 |     |
|----------------|---------------------------------------------------------------------------------|-----|
| SAMCCGM7_c3357 | ATP-dependent DNA ligase clustered with Ku protein, LigD                        | -   |
| SAMCCGM7_c3376 | hypothetical protein                                                            | -   |
| SAMCCGM7_c3393 | hypothetical protein                                                            | -   |
| SAMCCGM7_c3404 | hypothetical protein                                                            | -   |
| SAMCCGM7_c3434 | hypothetical protein                                                            | -   |
| SAMCCGM7_c3435 | hypothetical protein                                                            | -   |
| SAMCCGM7_c3467 | asparagine synthetase (glutamine-hydrolyzing)                                   | -   |
| SAMCCGM7_c3481 | hypothetical protein                                                            | -   |
| SAMCCGM7_c3489 | pantothenate kinase                                                             | -   |
| SAMCCGM7_c3498 | hypothetical protein                                                            | -   |
| SAMCCGM7_c3510 | hypothetical protein                                                            | -   |
| SAMCCGM7_c3512 | hypothetical protein                                                            | -   |
| SAMCCGM7_c3527 | hypothetical protein                                                            | -   |
| SAMCCGM7_c3528 | hypothetical protein                                                            | -   |
| SAMCCGM7_c3529 | hypothetical protein                                                            | -   |
| SAMCCGM7_c3532 | L-lactate dehydrogenase                                                         | ldh |
| SAMCCGM7_c3534 | hypothetical protein                                                            | -   |
| SAMCCGM7_c3547 | hypothetical protein                                                            | -   |
| SAMCCGM7_c3561 | hypothetical protein                                                            | -   |
| SAMCCGM7_c3584 | hypothetical protein                                                            | -   |
| SAMCCGM7_c3588 | transposase                                                                     | -   |
| SAMCCGM7_c3592 | hypothetical protein                                                            | -   |
| SAMCCGM7_c3600 | potassium efflux system KefA protein / Small-conductance mechanosensitive chan- | -   |
| SAMCCGM7_c3612 | hypothetical protein                                                            | -   |
| SAMCCGM7_c3617 | hypothetical protein                                                            | -   |
| SAMCCGM7_c3620 | hypothetical protein                                                            | -   |
| SAMCCGM7_c3625 | hypothetical protein                                                            | -   |
| SAMCCGM7_c3633 | hypothetical protein                                                            | -   |
| SAMCCGM7_c3641 | hypothetical protein                                                            | -   |
| SAMCCGM7_c3643 | hypothetical protein                                                            | -   |
| SAMCCGM7_c3653 | hypothetical protein                                                            | -   |
| SAMCCGM7_c3670 | hypothetical protein                                                            | -   |
| SAMCCGM7_c3671 | hypothetical protein                                                            | -   |
| SAMCCGM7_c3695 | ATP-binding component of ABC transporter                                        | -   |
| SAMCCGM7_c3696 | hypothetical protein                                                            | -   |
| SAMCCGM7_c3721 | hypothetical protein                                                            | -   |
| SAMCCGM7_c3738 | hypothetical protein                                                            | -   |
| SAMCCGM7_c3743 | hypothetical protein                                                            | -   |
| SAMCCGM7_c3744 | transposase                                                                     | -   |
| SAMCCGM7_c3751 | hypothetical protein                                                            | -   |
| SAMCCGM7_c3752 | hypothetical protein                                                            | -   |
| SAMCCGM7_c3753 | transmembrane HlyD type I secretion protein                                     | -   |
| SAMCCGM7_c3758 | hypothetical protein                                                            | -   |
| SAMCCGM7_c3770 | transposase                                                                     | -   |
| SAMCCGM7_c3771 | transposase                                                                     | -   |
| SAMCCGM7_c3772 | transposase                                                                     | -   |
| SAMCCGM7_c3774 | integrase/recombinase                                                           | -   |
| SAMCCGM7_c3780 | hypothetical protein                                                            | -   |
| SAMCCGM7_c3805 | hypothetical protein                                                            | -   |
| SAMCCGM7_c3806 | hypothetical protein                                                            | -   |
| SAMCCGM7_c3813 | hypothetical protein                                                            | -   |
| SAMCCGM7_c3815 | transmembrane protein                                                           | -   |
| SAMCCGM7_c3816 | LysR family transcriptional regulator                                           | -   |
| SAMCCGM7_c3817 | hypothetical protein                                                            | -   |
| SAMCCGM7_c3818 | cell division trigger factor                                                    | -   |
| SAMCCGM7_c3821 | hypothetical protein                                                            | -   |
| SAMCCGM7_c3822 | hypothetical protein                                                            | -   |
| SAMCCGM7_c3823 | 3-oxoacyl-(acyl-carrier-protein) synthase, KASII                                | -   |
| SAMCCGM7_c3824 | hypothetical protein                                                            | -   |
| SAMCCGM7_c3830 | fumarylacetoacetate (FAA) hydrolase                                             | -   |

|                |                                                       |      |
|----------------|-------------------------------------------------------|------|
| SAMCCGM7_c3831 | sugar ABC transport system, permease                  | -    |
| SAMCCGM7_c3832 | ribose import ATP-binding protein RbsA                | rbsA |
| SAMCCGM7_c3834 | 2-hydroxymuconic semialdehyde hydrolase, protein PydB | -    |
| SAMCCGM7_c3835 | dioxygenase protein PydA                              | -    |
| SAMCCGM7_c3836 | GntR family transcriptional regulator                 | -    |
| SAMCCGM7_c3837 | hypothetical protein                                  | -    |
| SAMCCGM7_c3838 | hypothetical protein                                  | -    |
| SAMCCGM7_c3839 | hypothetical protein                                  | -    |
| SAMCCGM7_c3840 | TetR family transcriptional regulator                 | -    |
| SAMCCGM7_c3841 | ThiJ/Pfpl family protein                              | -    |
| SAMCCGM7_c3843 | 7-alpha-hydroxysteroid dehydrogenase                  | hdhA |
| SAMCCGM7_c3844 | hypothetical protein                                  | -    |
| SAMCCGM7_c3845 | amine oxidase                                         | -    |
| SAMCCGM7_c3846 | alcohol dehydrogenase                                 | -    |
| SAMCCGM7_c3848 | aminotransferase, class I and II                      | -    |
| SAMCCGM7_c3849 | aminotransferase, class I and II                      | -    |
| SAMCCGM7_c3850 | aminotransferase                                      | -    |
| SAMCCGM7_c3851 | 6-phosphogluconolactonase                             | -    |
| SAMCCGM7_c3857 | hypothetical protein                                  | -    |
| SAMCCGM7_c3858 | hypothetical protein                                  | -    |
| SAMCCGM7_c3859 | hypothetical protein                                  | -    |
| SAMCCGM7_c3863 | hypothetical protein                                  | -    |
| SAMCCGM7_c3864 | hypothetical protein                                  | -    |
| SAMCCGM7_c3865 | hypothetical protein                                  | -    |
| SAMCCGM7_c3868 | hypothetical protein                                  | -    |
| SAMCCGM7_c3869 | hypothetical protein                                  | -    |
| SAMCCGM7_c3870 | hypothetical protein                                  | -    |
| SAMCCGM7_c3871 | extracellular nuclease                                | -    |
| SAMCCGM7_c3872 | hypothetical protein                                  | -    |
| SAMCCGM7_c3873 | hypothetical protein                                  | -    |
| SAMCCGM7_c3874 | ATP-binding protein                                   | -    |
| SAMCCGM7_c3875 | phosphoadenosine phosphosulfate reductase             | -    |
| SAMCCGM7_c3876 | cell division protein FtsK                            | -    |
| SAMCCGM7_c3877 | hypothetical protein                                  | -    |
| SAMCCGM7_c3878 | hypothetical protein                                  | -    |
| SAMCCGM7_c3879 | hypothetical protein                                  | -    |
| SAMCCGM7_c3880 | hypothetical protein                                  | -    |
| SAMCCGM7_c3897 | plasmid partitioning protein RepAa2                   | repA |
| SAMCCGM7_c3898 | replication protein                                   | repB |
| SAMCCGM7_c3899 | plasmid replication protein RepCa2                    | repC |
| SAMCCGM7_c3900 | hypothetical protein                                  | -    |
| SAMCCGM7_c3903 | hypothetical protein                                  | -    |
| SAMCCGM7_c3904 | segregation and condensation protein B                | -    |
| SAMCCGM7_c3905 | hypothetical protein                                  | -    |
| SAMCCGM7_c3906 | hypothetical protein                                  | -    |
| SAMCCGM7_c3907 | hypothetical protein                                  | -    |
| SAMCCGM7_c3908 | hypothetical protein                                  | -    |
| SAMCCGM7_c3909 | hypothetical protein                                  | -    |
| SAMCCGM7_c3910 | hypothetical protein                                  | -    |
| SAMCCGM7_c3911 | hypothetical protein                                  | -    |
| SAMCCGM7_c3912 | hypothetical protein                                  | -    |
| SAMCCGM7_c3913 | hypothetical protein                                  | -    |
| SAMCCGM7_c3914 | hypothetical protein                                  | -    |
| SAMCCGM7_c3915 | hypothetical protein                                  | -    |
| SAMCCGM7_c3918 | hypothetical protein                                  | -    |
| SAMCCGM7_c3919 | glutathione S-transferase                             | -    |
| SAMCCGM7_c3921 | hypothetical protein                                  | -    |
| SAMCCGM7_c3932 | hypothetical protein                                  | -    |
| SAMCCGM7_c3934 | hypothetical protein                                  | -    |
| SAMCCGM7_c3935 | hypothetical protein                                  | -    |

|                |                                                                       |      |
|----------------|-----------------------------------------------------------------------|------|
| SAMCCGM7_c3936 | translation initiation inhibitor protein                              | -    |
| SAMCCGM7_c3937 | cation transport protein chaC                                         | -    |
| SAMCCGM7_c3943 | hypothetical protein                                                  | -    |
| SAMCCGM7_c3946 | hypothetical protein                                                  | -    |
| SAMCCGM7_c3948 | hypothetical protein                                                  | -    |
| SAMCCGM7_c3950 | hypothetical protein                                                  | -    |
| SAMCCGM7_c3951 | hypothetical protein                                                  | -    |
| SAMCCGM7_c3961 | phosphonate ABC transporter                                           | -    |
| SAMCCGM7_c3962 | integral membrane sensor signal transduction histidine kinase         | -    |
| SAMCCGM7_c3963 | transcriptional regulator, nitrogen regulation protein NR(I)          | -    |
| SAMCCGM7_c3964 | arsenite oxidase small subunit precursor                              | aroB |
| SAMCCGM7_c3965 | arsenite oxidase subunit AioA                                         | aioA |
| SAMCCGM7_c3966 | ArsR family transcriptional regulator                                 | -    |
| SAMCCGM7_c3967 | hypothetical protein                                                  | -    |
| SAMCCGM7_c3969 | phosphate regulon transcriptional regulatory protein PhoB             | phoB |
| SAMCCGM7_c3970 | phosphate regulon, two-component response regulator protein           | phoB |
| SAMCCGM7_c3971 | phosphate-specific transport system accessory protein PhoU            | phoU |
| SAMCCGM7_c3973 | phosphate ABC transporter permease PstA                               | -    |
| SAMCCGM7_c3974 | high-affinity phosphate ABC transporter membrane protein              | pstC |
| SAMCCGM7_c3975 | phosphate ABC transporter, periplasmic phosphate-binding protein PstS | -    |
| SAMCCGM7_c3978 | hypothetical protein                                                  | -    |
| SAMCCGM7_c3984 | hypothetical protein                                                  | -    |
| SAMCCGM7_c3986 | hypothetical protein                                                  | -    |
| SAMCCGM7_c3987 | hypothetical protein                                                  | -    |
| SAMCCGM7_c3992 | AraC family transcriptional regulator                                 | -    |
| SAMCCGM7_c3993 | dehydrogenase/reductase                                               | -    |
| SAMCCGM7_c3994 | phage integrase                                                       | -    |
| SAMCCGM7_c3995 | hypothetical protein                                                  | -    |
| SAMCCGM7_c4009 | hypothetical protein                                                  | -    |
| SAMCCGM7_c4012 | hypothetical protein                                                  | -    |
| SAMCCGM7_c4016 | hypothetical protein                                                  | -    |
| SAMCCGM7_c4020 | hypothetical protein                                                  | -    |
| SAMCCGM7_c4021 | C4-dicarboxylate transport transcriptional regulatory protein DctD    | dctD |
| SAMCCGM7_c4022 | C4-dicarboxylate transport sensor                                     | dctB |
| SAMCCGM7_c4023 | proton/sodium-glutamate symport protein                               | gltT |
| SAMCCGM7_c4025 | hypothetical protein                                                  | -    |
| SAMCCGM7_c4028 | hypothetical protein                                                  | -    |
| SAMCCGM7_c4030 | transcriptional regulator                                             | -    |
| SAMCCGM7_c4031 | hypothetical protein                                                  | -    |
| SAMCCGM7_c4034 | hypothetical protein                                                  | -    |
| SAMCCGM7_c4036 | DNA repair protein                                                    | -    |
| SAMCCGM7_c4039 | hypothetical protein                                                  | -    |
| SAMCCGM7_c4043 | DNA-directed DNA polymerase protein                                   | -    |
| SAMCCGM7_c4044 | DNA polymerase IV                                                     | -    |
| SAMCCGM7_c4046 | hypothetical protein                                                  | -    |
| SAMCCGM7_c4048 | LysR family transcriptional regulator                                 | -    |
| SAMCCGM7_c4049 | transporter protein                                                   | -    |
| SAMCCGM7_c4050 | hypothetical protein                                                  | -    |
| SAMCCGM7_c4052 | diguanylate cyclase                                                   | -    |
| SAMCCGM7_c4053 | diguanylate cyclase/phosphodiesterase (GGDEF & EAL domains)           | -    |
| SAMCCGM7_c4054 | HipA domain-containing protein                                        | -    |
| SAMCCGM7_c4055 | XRE family transcriptional regulator                                  | -    |
| SAMCCGM7_c4060 | general stress protein                                                | -    |
| SAMCCGM7_c4062 | ATP-dependent DNA ligase clustered with Ku protein, LigD              | -    |
| SAMCCGM7_c4064 | exonuclease RNase T and DNA polymerase III                            | -    |
| SAMCCGM7_c4065 | hypothetical protein                                                  | -    |
| SAMCCGM7_c4067 | surface polysaccharides/antigen                                       | -    |
| SAMCCGM7_c4068 | hypothetical protein                                                  | -    |
| SAMCCGM7_c4070 | hypothetical protein                                                  | -    |
| SAMCCGM7_c4072 | hypothetical protein                                                  | -    |



|                |                                                          |      |
|----------------|----------------------------------------------------------|------|
| SAMCCGM7_c4074 | hypothetical protein                                     | -    |
| SAMCCGM7_c4080 | amino acid ABC transporter,substrate-binding protein     | -    |
| SAMCCGM7_c4081 | glutamine transport ATP-binding protein GlnQ             | glnQ |
| SAMCCGM7_c4082 | polar amino acid ABC transporter inner membrane subunit  | -    |
| SAMCCGM7_c4083 | polar amino acid ABC transporter, inner membrane subunit | -    |
| SAMCCGM7_c4084 | hypothetical protein                                     | -    |
| SAMCCGM7_c4085 | xylose isomerase domain-containing protein               | -    |
| SAMCCGM7_c4086 | LysR family transcriptional regulator                    | -    |
| SAMCCGM7_c4087 | hypothetical protein                                     | -    |
| SAMCCGM7_c4090 | hypothetical protein                                     | -    |
| SAMCCGM7_c4091 | hypothetical protein                                     | -    |
| SAMCCGM7_c4093 | hypothetical protein                                     | -    |
| SAMCCGM7_c4094 | plasmid maintenance system killer                        | -    |
| SAMCCGM7_c4106 | hypothetical protein                                     | -    |
| SAMCCGM7_c4126 | hypothetical protein                                     | -    |
| SAMCCGM7_c4131 | AraC family transcriptional regulator                    | -    |
| SAMCCGM7_c4141 | hypothetical protein                                     | -    |
| SAMCCGM7_c4146 | hypothetical protein                                     | -    |
| SAMCCGM7_c4163 | tRNA/rRNA methyltransferase protein                      | -    |
| SAMCCGM7_c4176 | hypothetical protein                                     | -    |
| SAMCCGM7_c4195 | hypothetical protein                                     | -    |
| SAMCCGM7_c4221 | hypothetical protein                                     | -    |
| SAMCCGM7_c4222 | hypothetical protein                                     | -    |
| SAMCCGM7_c4224 | hypothetical protein                                     | -    |
| SAMCCGM7_c4239 | hypothetical protein                                     | -    |
| SAMCCGM7_c4266 | hypothetical protein                                     | -    |
| SAMCCGM7_c4280 | hypothetical protein                                     | -    |
| SAMCCGM7_c4291 | hypothetical protein                                     | -    |
| SAMCCGM7_c4301 | hypothetical protein                                     | -    |
| SAMCCGM7_c4309 | immunoreactive                                           | -    |
| SAMCCGM7_c4310 | hypothetical protein                                     | -    |
| SAMCCGM7_c4339 | hypothetical protein                                     | -    |
| SAMCCGM7_c4340 | hypothetical protein                                     | -    |
| SAMCCGM7_c4341 | secretion activator protein                              | -    |
| SAMCCGM7_c4362 | hypothetical protein                                     | -    |
| SAMCCGM7_c4363 | hypothetical protein                                     | -    |
| SAMCCGM7_c4378 | hypothetical protein                                     | -    |
| SAMCCGM7_c4380 | hypothetical protein                                     | -    |
| SAMCCGM7_c4397 | hypothetical protein                                     | -    |
| SAMCCGM7_c4404 | hypothetical protein                                     | -    |
| SAMCCGM7_c4410 | hypothetical protein                                     | -    |
| SAMCCGM7_c4413 | hypothetical protein                                     | -    |
| SAMCCGM7_c4429 | adenylate cyclase                                        | -    |
| SAMCCGM7_c4431 | adenylate cyclase                                        | -    |
| SAMCCGM7_c4440 | hypothetical protein                                     | -    |
| SAMCCGM7_c4454 | hypothetical protein                                     | -    |
| SAMCCGM7_c4465 | hypothetical protein                                     | -    |
| SAMCCGM7_c4502 | hypothetical protein                                     | -    |
| SAMCCGM7_c4512 | hypothetical protein                                     | -    |
| SAMCCGM7_c4566 | hypothetical protein                                     | -    |
| SAMCCGM7_c4583 | hypothetical protein                                     | -    |
| SAMCCGM7_c4588 | hypothetical protein                                     | -    |
| SAMCCGM7_c4620 | hypothetical protein                                     | -    |
| SAMCCGM7_c4642 | hypothetical protein                                     | -    |
| SAMCCGM7_c4654 | hypothetical protein                                     | -    |
| SAMCCGM7_c4656 | LuxR family transcriptional regulator                    | -    |
| SAMCCGM7_c4666 | hypothetical protein                                     | -    |
| SAMCCGM7_c4691 | hypothetical protein                                     | -    |
| SAMCCGM7_c4699 | hypothetical protein                                     | -    |
| SAMCCGM7_c4709 | hypothetical protein                                     | -    |

|                |                                                                                 |      |
|----------------|---------------------------------------------------------------------------------|------|
| SAMCCGM7_c4715 | hypothetical protein                                                            | -    |
| SAMCCGM7_c4719 | hypothetical protein                                                            | -    |
| SAMCCGM7_c4757 | hypothetical protein                                                            | -    |
| SAMCCGM7_c4758 | hypothetical protein                                                            | -    |
| SAMCCGM7_c4759 | hypothetical protein                                                            | -    |
| SAMCCGM7_c4760 | hypothetical protein                                                            | -    |
| SAMCCGM7_c4765 | hypothetical protein                                                            | -    |
| SAMCCGM7_c4778 | hypothetical protein                                                            | -    |
| SAMCCGM7_c4782 | hypothetical protein                                                            | -    |
| SAMCCGM7_c4788 | hypothetical protein                                                            | -    |
| SAMCCGM7_c4790 | hypothetical protein                                                            | -    |
| SAMCCGM7_c4794 | hypothetical protein                                                            | -    |
| SAMCCGM7_c4807 | hypothetical protein                                                            | -    |
| SAMCCGM7_c4811 | hypothetical protein                                                            | -    |
| SAMCCGM7_c4819 | hypothetical protein                                                            | -    |
| SAMCCGM7_c4822 | hypothetical protein                                                            | -    |
| SAMCCGM7_c4827 | hypothetical protein                                                            | -    |
| SAMCCGM7_c4835 | hypothetical protein                                                            | -    |
| SAMCCGM7_c4841 | hypothetical protein                                                            | -    |
| SAMCCGM7_c4874 | hypothetical protein                                                            | -    |
| SAMCCGM7_c4895 | hypothetical protein                                                            | -    |
| SAMCCGM7_c4919 | dethiobiotin synthetase                                                         | -    |
| SAMCCGM7_c4928 | hypothetical protein                                                            | -    |
| SAMCCGM7_c4971 | hypothetical protein                                                            | -    |
| SAMCCGM7_c4990 | hypothetical protein                                                            | -    |
| SAMCCGM7_c4991 | hypothetical protein                                                            | -    |
| SAMCCGM7_c4992 | hypothetical protein                                                            | -    |
| SAMCCGM7_c4998 | alcohol dehydrogenase                                                           | -    |
| SAMCCGM7_c4999 | hypothetical protein                                                            | -    |
| SAMCCGM7_c5000 | amine oxidase                                                                   | -    |
| SAMCCGM7_c5001 | LysR family transcriptional regulator                                           | -    |
| SAMCCGM7_c5002 | aminotransferase, class I and II                                                | -    |
| SAMCCGM7_c5003 | endoribonuclease                                                                | -    |
| SAMCCGM7_c5004 | glutamate/glutamine/aspartate/asparagine-binding protein BztA                   | bztA |
| SAMCCGM7_c5005 | hypothetical protein                                                            | -    |
| SAMCCGM7_c5006 | glutamate/glutamine/aspartate/asparagine transport system permease protein BztI | bztB |
| SAMCCGM7_c5007 | glutamate/glutamine/aspartate/asparagine transport system permease protein BztI | bztC |
| SAMCCGM7_c5008 | general L-amino acid transport ATP-binding protein AapP                         | aapP |
| SAMCCGM7_c5024 | S-isoprenylcysteine methyltransferase                                           | -    |
| SAMCCGM7_c5042 | hypothetical protein                                                            | -    |
| SAMCCGM7_c5057 | hypothetical protein                                                            | -    |
| SAMCCGM7_c5066 | hypothetical protein                                                            | -    |
| SAMCCGM7_c5067 | hypothetical protein                                                            | -    |
| SAMCCGM7_c5075 | short-chain dehydrogenase/reductase SDR                                         | -    |
| SAMCCGM7_c5076 | regulatory protein GntR HTH                                                     | -    |
| SAMCCGM7_c5077 | glucose 1-dehydrogenase                                                         | -    |
| SAMCCGM7_c5078 | L-proline glycine betaine binding ABC transporter protein ProX                  | -    |
| SAMCCGM7_c5079 | L-proline glycine betaine ABC transport system permease                         | -    |
| SAMCCGM7_c5081 | hypothetical protein                                                            | -    |
| SAMCCGM7_c5082 | transport protein                                                               | -    |
| SAMCCGM7_c5083 | transcriptional regulator, LysR family                                          | -    |
| SAMCCGM7_c5088 | hypothetical protein                                                            | -    |
| SAMCCGM7_c5111 | S-(hydroxymethyl)glutathione dehydrogenase                                      | -    |
| SAMCCGM7_c5116 | ribonuclease activity regulator protein RraA                                    | -    |
| SAMCCGM7_c5117 | ribulose-5-phosphate 4-epimerase and epimerases and aldolase                    | -    |
| SAMCCGM7_c5121 | Fe(3+) ions import ATP-binding protein FbpC                                     | fbcP |
| SAMCCGM7_c5122 | binding-protein-dependent transporters inner membrane component                 | -    |
| SAMCCGM7_c5123 | ABC-type Fe3+ transport system, periplasmic component                           | -    |
| SAMCCGM7_c5125 | GntR family transcriptional regulator                                           | -    |
| SAMCCGM7_c5126 | small heat shock protein                                                        | -    |

|                |                                                                     |   |
|----------------|---------------------------------------------------------------------|---|
| SAMCCGM7_c5131 | hypothetical protein                                                | - |
| SAMCCGM7_c5133 | ABC-type transport, permease protein                                | - |
| SAMCCGM7_c5137 | 3-oxoacyl-(acyl-carrier protein) reductase                          | - |
| SAMCCGM7_c5159 | cytidine/deoxycytidylate deaminase family protein                   | - |
| SAMCCGM7_c5161 | hypothetical protein                                                | - |
| SAMCCGM7_c5165 | hypothetical protein                                                | - |
| SAMCCGM7_c5177 | hypothetical protein                                                | - |
| SAMCCGM7_c5179 | hypothetical protein                                                | - |
| SAMCCGM7_c5180 | flavin-containing monooxygenase                                     | - |
| SAMCCGM7_c5193 | LysR family transcriptional regulator                               | - |
| SAMCCGM7_c5194 | hydrolase                                                           | - |
| SAMCCGM7_c5195 | hypothetical protein                                                | - |
| SAMCCGM7_c5200 | hypothetical protein                                                | - |
| SAMCCGM7_c5201 | hypothetical protein                                                | - |
| SAMCCGM7_c5202 | transposase                                                         | - |
| SAMCCGM7_c5203 | hypothetical protein                                                | - |
| SAMCCGM7_c5216 | membrane-anchored protein                                           | - |
| SAMCCGM7_c5218 | hypothetical protein                                                | - |
| SAMCCGM7_c5219 | endo-1,3-1,4-BETA-glycanase <sup>-</sup> , Ä†EgIC                   | - |
| SAMCCGM7_c5224 | hypothetical protein                                                | - |
| SAMCCGM7_c5227 | hypothetical protein                                                | - |
| SAMCCGM7_c5230 | transposase                                                         | - |
| SAMCCGM7_c5239 | hypothetical protein                                                | - |
| SAMCCGM7_c5240 | cytolethal distending toxin subunit B                               | - |
| SAMCCGM7_c5253 | hypothetical protein                                                | - |
| SAMCCGM7_c5255 | oligopeptide transport system permease protein OppB                 | - |
| SAMCCGM7_c5256 | hypothetical protein                                                | - |
| SAMCCGM7_c5257 | D-3-phosphoglycerate dehydrogenase                                  | - |
| SAMCCGM7_c5258 | D-3-phosphoglycerate dehydrogenase                                  | - |
| SAMCCGM7_c5259 | acetylornithine deacetylase                                         | - |
| SAMCCGM7_c5274 | hypothetical protein                                                | - |
| SAMCCGM7_c5297 | electron transfer flavoprotein, alpha subunit                       | - |
| SAMCCGM7_c5320 | hypothetical protein                                                | - |
| SAMCCGM7_c5374 | hypothetical protein                                                | - |
| SAMCCGM7_c5377 | hypothetical protein                                                | - |
| SAMCCGM7_c5380 | hypothetical protein                                                | - |
| SAMCCGM7_c5382 | multidrug and toxin extrusion (MATE) family efflux pump YdhE/NorM   | - |
| SAMCCGM7_c5383 | ABC-type antimicrobial peptide transport system, permease component | - |
| SAMCCGM7_c5391 | glycine betaine/L-proline ABC transporter permease                  | - |
| SAMCCGM7_c5399 | hypothetical protein                                                | - |
| SAMCCGM7_c5400 | hypothetical protein                                                | - |
| SAMCCGM7_c5410 | hypothetical protein                                                | - |
| SAMCCGM7_c5422 | hypothetical protein                                                | - |
| SAMCCGM7_c5424 | hypothetical protein                                                | - |
| SAMCCGM7_c5427 | hypothetical protein                                                | - |
| SAMCCGM7_c5431 | hypothetical protein                                                | - |
| SAMCCGM7_c5437 | ATP-dependent DNA ligase                                            | - |
| SAMCCGM7_c5438 | DNA ligase                                                          | - |
| SAMCCGM7_c5444 | hypothetical protein                                                | - |
| SAMCCGM7_c5460 | hypothetical protein                                                | - |
| SAMCCGM7_c5483 | chromosome partition protein smc                                    | - |
| SAMCCGM7_c5486 | hypothetical protein                                                | - |
| SAMCCGM7_c5491 | hypothetical protein                                                | - |
| SAMCCGM7_c5501 | hypothetical protein                                                | - |
| SAMCCGM7_c5510 | hypothetical protein                                                | - |
| SAMCCGM7_c5513 | hypothetical protein                                                | - |
| SAMCCGM7_c5514 | oxidoreductase                                                      | - |
| SAMCCGM7_c5515 | short-chain dehydrogenase/reductase SDR                             | - |
| SAMCCGM7_c5516 | hypothetical protein                                                | - |
| SAMCCGM7_c5517 | hypothetical protein                                                | - |

|                |                                                                                 |      |
|----------------|---------------------------------------------------------------------------------|------|
| SAMCCGM7_c5518 | hypothetical protein                                                            | -    |
| SAMCCGM7_c5520 | hypothetical protein                                                            | -    |
| SAMCCGM7_c5521 | hypothetical protein                                                            | -    |
| SAMCCGM7_c5523 | hypothetical protein                                                            | -    |
| SAMCCGM7_c5524 | hypothetical protein                                                            | -    |
| SAMCCGM7_c5525 | hypothetical protein                                                            | -    |
| SAMCCGM7_c5527 | hypothetical protein                                                            | -    |
| SAMCCGM7_c5533 | MotA/TolQ/ExbB proton channel family protein, probably associated with flagella | -    |
| SAMCCGM7_c5557 | hypothetical protein                                                            | -    |
| SAMCCGM7_c5565 | hypothetical protein                                                            | -    |
| SAMCCGM7_c5573 | hypothetical protein                                                            | -    |
| SAMCCGM7_c5580 | hypothetical protein                                                            | -    |
| SAMCCGM7_c5583 | hypothetical protein                                                            | -    |
| SAMCCGM7_c5592 | hypothetical protein                                                            | -    |
| SAMCCGM7_c5613 | hypothetical protein                                                            | -    |
| SAMCCGM7_c5624 | NAD(P) transhydrogenase alpha subunit                                           | -    |
| SAMCCGM7_c5642 | hypothetical protein                                                            | -    |
| SAMCCGM7_c5669 | AraC family transcriptional regulator                                           | -    |
| SAMCCGM7_c5715 | PE-PGRS family protein                                                          | -    |
| SAMCCGM7_c5720 | hypothetical protein                                                            | -    |
| SAMCCGM7_c5727 | hypothetical protein                                                            | -    |
| SAMCCGM7_c5734 | hypothetical protein                                                            | -    |
| SAMCCGM7_c5742 | hypothetical protein                                                            | -    |
| SAMCCGM7_c5744 | hypothetical protein                                                            | -    |
| SAMCCGM7_c5758 | hypothetical protein                                                            | -    |
| SAMCCGM7_c5778 | hypothetical protein                                                            | -    |
| SAMCCGM7_c5805 | hypothetical protein                                                            | -    |
| SAMCCGM7_c5817 | lipoprotein                                                                     | -    |
| SAMCCGM7_c5818 | lipoprotein                                                                     | -    |
| SAMCCGM7_c5823 | hypothetical protein                                                            | -    |
| SAMCCGM7_c5846 | hypothetical protein                                                            | -    |
| SAMCCGM7_c5861 | hypothetical protein                                                            | -    |
| SAMCCGM7_c5863 | hypothetical protein                                                            | -    |
| SAMCCGM7_c5867 | type I restriction-modification system, DNA-methyltransferase subunit M         | -    |
| SAMCCGM7_c5868 | type I restriction-modification system, specificity subunit S                   | -    |
| SAMCCGM7_c5870 | metal-dependent hydrolase                                                       | -    |
| SAMCCGM7_c5872 | hypothetical protein                                                            | -    |
| SAMCCGM7_c5873 | hypothetical protein                                                            | -    |
| SAMCCGM7_c5874 | hypothetical protein                                                            | -    |
| SAMCCGM7_c5875 | hypothetical protein                                                            | -    |
| SAMCCGM7_c5876 | hypothetical protein                                                            | -    |
| SAMCCGM7_c5877 | hypothetical protein                                                            | -    |
| SAMCCGM7_c5878 | hypothetical protein                                                            | -    |
| SAMCCGM7_c5879 | hypothetical protein                                                            | -    |
| SAMCCGM7_c5880 | hypothetical protein                                                            | -    |
| SAMCCGM7_c5882 | hypothetical protein                                                            | -    |
| SAMCCGM7_c5883 | hypothetical protein                                                            | -    |
| SAMCCGM7_c5897 | hypothetical protein                                                            | -    |
| SAMCCGM7_c5903 | hypothetical protein                                                            | -    |
| SAMCCGM7_c5904 | hypothetical protein                                                            | -    |
| SAMCCGM7_c5908 | DNA polymerase protein                                                          | -    |
| SAMCCGM7_c5909 | DNA polymerase protein                                                          | -    |
| SAMCCGM7_c5916 | hypothetical protein                                                            | -    |
| SAMCCGM7_c5921 | transcriptional regulator                                                       | -    |
| SAMCCGM7_c5933 | hypothetical protein                                                            | -    |
| SAMCCGM7_c5951 | hypothetical protein                                                            | -    |
| SAMCCGM7_c5954 | hypothetical protein                                                            | -    |
| SAMCCGM7_c5955 | hypothetical protein                                                            | -    |
| SAMCCGM7_c5956 | hypothetical protein                                                            | -    |
| SAMCCGM7_c5957 | choline dehydrogenase                                                           | betA |

|                |                                                                |      |
|----------------|----------------------------------------------------------------|------|
| SAMCCGM7_c5958 | L-proline glycine betaine binding ABC transporter protein ProX | -    |
| SAMCCGM7_c5959 | 3-hydroxyisobutyrate dehydrogenase                             | -    |
| SAMCCGM7_c5960 | LysR family transcriptional regulator                          | -    |
| SAMCCGM7_c5965 | hypothetical protein                                           | -    |
| SAMCCGM7_c5978 | hypothetical protein                                           | -    |
| SAMCCGM7_c5989 | TetR family transcriptional regulator                          | -    |
| SAMCCGM7_c5990 | hypothetical protein                                           | -    |
| SAMCCGM7_c5995 | multidrug-efflux transporter                                   | -    |
| SAMCCGM7_c5996 | hypothetical protein                                           | -    |
| SAMCCGM7_c5998 | hypothetical protein                                           | -    |
| SAMCCGM7_c6000 | transposase                                                    | -    |
| SAMCCGM7_c6002 | hypothetical protein                                           | -    |
| SAMCCGM7_c6003 | hypothetical protein                                           | -    |
| SAMCCGM7_c6006 | hypothetical protein                                           | -    |
| SAMCCGM7_c6008 | hypothetical protein                                           | -    |
| SAMCCGM7_c6009 | hypothetical protein                                           | -    |
| SAMCCGM7_c6017 | hypothetical protein                                           | -    |
| SAMCCGM7_c6018 | hypothetical protein                                           | -    |
| SAMCCGM7_c6019 | hypothetical protein                                           | -    |
| SAMCCGM7_c6034 | secretion protein HlyD                                         | -    |
| SAMCCGM7_c6036 | hypothetical protein                                           | -    |
| SAMCCGM7_c6037 | epoxide hydrolase                                              | -    |
| SAMCCGM7_c6039 | hypothetical protein                                           | -    |
| SAMCCGM7_c6042 | hypothetical protein                                           | -    |
| SAMCCGM7_c6043 | hypothetical protein                                           | -    |
| SAMCCGM7_c6044 | peptide methionine sulfoxide reductase MsrB                    | msrB |
| SAMCCGM7_c6049 | pyridoxamine 5'-phosphate oxidase FMN-binding protein          | -    |
| SAMCCGM7_c6054 | hypothetical protein                                           | -    |
| SAMCCGM7_c6061 | hypothetical protein                                           | -    |
| SAMCCGM7_c6065 | hypothetical protein                                           | -    |
| SAMCCGM7_c6071 | hypothetical protein                                           | -    |
| SAMCCGM7_c6072 | hypothetical protein                                           | -    |
| SAMCCGM7_c6073 | signal transduction histidine kinase                           | -    |
| SAMCCGM7_c6075 | hypothetical protein                                           | -    |
| SAMCCGM7_c6090 | sensor histidine kinase domain-containing protein              | -    |
| SAMCCGM7_c6091 | hypothetical protein                                           | -    |
| SAMCCGM7_c6092 | two-component sensor histidine kinase protein                  | -    |
| SAMCCGM7_c6093 | hypothetical protein                                           | -    |
| SAMCCGM7_c6094 | iron(III) ABC transporter, ATP-binding protein                 | -    |
| SAMCCGM7_c6095 | ferric cations import ATP-binding protein fbpC                 | -    |
| SAMCCGM7_c6096 | inositol-1-monophosphatase                                     | -    |
| SAMCCGM7_c6097 | inositol-1-monophosphatase                                     | -    |
| SAMCCGM7_c6102 | hypothetical protein                                           | -    |
| SAMCCGM7_c6103 | LysR family transcriptional regulator                          | -    |
| SAMCCGM7_c6105 | hypothetical protein                                           | -    |
| SAMCCGM7_c6109 | hypothetical protein                                           | -    |
| SAMCCGM7_c6111 | hypothetical protein                                           | -    |
| SAMCCGM7_c6112 | transcriptional regulator SyrB                                 | -    |
| SAMCCGM7_c6113 | hypothetical protein                                           | -    |
| SAMCCGM7_c6114 | radical SAM superfamily enzyme                                 | -    |
| SAMCCGM7_c6116 | sn-glycerol-3-phosphate import ATP-binding protein UgpC        | ugpC |
| SAMCCGM7_c6118 | sugar ABC transporter, permease protein                        | -    |
| SAMCCGM7_c6119 | glycerol-3-phosphate ABC transporter                           | -    |
| SAMCCGM7_c6120 | metallophosphoesterase                                         | -    |
| SAMCCGM7_c6121 | hydrolase phosphatase                                          | -    |
| SAMCCGM7_c6122 | MFS-type transport protein                                     | -    |
| SAMCCGM7_c6123 | hypothetical protein                                           | -    |
| SAMCCGM7_c6125 | hypothetical protein                                           | -    |
| SAMCCGM7_c6126 | hypothetical protein                                           | -    |
| SAMCCGM7_c6127 | hypothetical protein                                           | -    |

|                |                                                                    |      |
|----------------|--------------------------------------------------------------------|------|
| SAMCCGM7_c6128 | hypothetical protein                                               | -    |
| SAMCCGM7_c6129 | hypothetical protein                                               | -    |
| SAMCCGM7_c6130 | hypothetical protein                                               | -    |
| SAMCCGM7_c6132 | serine protease, subtilase family protein                          | -    |
| SAMCCGM7_c6133 | hypothetical protein                                               | -    |
| SAMCCGM7_c6134 | hypothetical protein                                               | -    |
| SAMCCGM7_c6135 | hypothetical protein                                               | -    |
| SAMCCGM7_c6136 | hypothetical protein                                               | -    |
| SAMCCGM7_c6137 | hypothetical protein                                               | -    |
| SAMCCGM7_c6138 | hydroperoxide reductase                                            | -    |
| SAMCCGM7_c6141 | hypothetical protein                                               | -    |
| SAMCCGM7_c6143 | hypothetical protein                                               | -    |
| SAMCCGM7_c6145 | homocitrate synthase                                               | nifV |
| SAMCCGM7_c6156 | hypothetical protein                                               | -    |
| SAMCCGM7_c6158 | exopolysaccharide production protein ExoZ                          | -    |
| SAMCCGM7_c6159 | exopolysaccharide production protein ExoZ                          | -    |
| SAMCCGM7_c6162 | NodH protein                                                       | -    |
| SAMCCGM7_c6163 | hypothetical protein                                               | -    |
| SAMCCGM7_c6173 | acyltransferase                                                    | nodA |
| SAMCCGM7_c6175 | hypothetical protein                                               | -    |
| SAMCCGM7_c6177 | Lacl family transcriptional regulator                              | -    |
| SAMCCGM7_c6178 | hypothetical protein                                               | -    |
| SAMCCGM7_c6179 | plasmid replication protein RepC                                   | repC |
| SAMCCGM7_c6183 | hypothetical protein                                               | -    |
| SAMCCGM7_c6184 | hypothetical protein                                               | -    |
| SAMCCGM7_c6186 | hypothetical protein                                               | -    |
| SAMCCGM7_c6187 | hypothetical protein                                               | -    |
| SAMCCGM7_c6188 | hypothetical protein                                               | -    |
| SAMCCGM7_c6189 | hypothetical protein                                               | -    |
| SAMCCGM7_c6190 | hypothetical protein                                               | -    |
| SAMCCGM7_c6191 | hypothetical protein                                               | -    |
| SAMCCGM7_c6193 | hypothetical protein                                               | -    |
| SAMCCGM7_c6202 | conjugal transfer protein traF precursor                           | -    |
| SAMCCGM7_c6205 | hypothetical protein                                               | -    |
| SAMCCGM7_c6206 | hypothetical protein                                               | -    |
| SAMCCGM7_c6208 | hypothetical protein                                               | -    |
| SAMCCGM7_c6209 | hypothetical protein                                               | -    |
| SAMCCGM7_c6210 | transposase                                                        | -    |
| SAMCCGM7_c6211 | transposase                                                        | -    |
| SAMCCGM7_c6213 | transposase                                                        | -    |
| SAMCCGM7_c6215 | dehydrogenase                                                      | -    |
| SAMCCGM7_c6216 | transposase                                                        | -    |
| SAMCCGM7_c6217 | transposase                                                        | -    |
| SAMCCGM7_c6218 | hypothetical protein                                               | -    |
| SAMCCGM7_c6219 | L-lysine 2,3-aminomutase                                           | kamA |
| SAMCCGM7_c6221 | transposase                                                        | -    |
| SAMCCGM7_c6222 | transposase                                                        | -    |
| SAMCCGM7_c6224 | hypothetical protein                                               | -    |
| SAMCCGM7_c6225 | transposase                                                        | -    |
| SAMCCGM7_c6226 | D-amino acid dehydrogenase small subunit                           | dadA |
| SAMCCGM7_c6227 | transposase                                                        | -    |
| SAMCCGM7_c6228 | UDP-N-acetylmuramoylalanyl-D-glutamate--2,6-diaminopimelate ligase | -    |
| SAMCCGM7_c6229 | hypothetical protein                                               | -    |
| SAMCCGM7_c6232 | pyruvate carboxyl transferase                                      | -    |
| SAMCCGM7_c6233 | hypothetical protein                                               | -    |
| SAMCCGM7_c6237 | hypothetical protein                                               | -    |
| SAMCCGM7_c6249 | hypothetical protein                                               | -    |
| SAMCCGM7_c6250 | hypothetical protein                                               | -    |
| SAMCCGM7_c6253 | hypothetical protein                                               | -    |
| SAMCCGM7_c6276 | hypothetical protein                                               | -    |

|                |                                                         |      |
|----------------|---------------------------------------------------------|------|
| SAMCCGM7_c6294 | low molecular weight protein tyrosine phosphatase       | -    |
| SAMCCGM7_c6315 | hypothetical protein                                    | -    |
| SAMCCGM7_c6325 | ATPase associated with various cellular activity, AAA_5 | -    |
| SAMCCGM7_c6326 | ATPase associated with various cellular activity, AAA_5 | -    |
| SAMCCGM7_c6327 | hypothetical protein                                    | -    |
| SAMCCGM7_c6331 | hypothetical protein                                    | -    |
| SAMCCGM7_c6348 | hypothetical protein                                    | -    |
| SAMCCGM7_c6349 | hypothetical protein                                    | -    |
| SAMCCGM7_c6361 | hypothetical protein                                    | -    |
| SAMCCGM7_c6365 | hypothetical protein                                    | -    |
| SAMCCGM7_c6410 | hypothetical protein                                    | -    |
| SAMCCGM7_c6418 | hypothetical protein                                    | -    |
| SAMCCGM7_c6436 | hypothetical protein                                    | -    |
| SAMCCGM7_c6465 | hypothetical protein                                    | -    |
| SAMCCGM7_c6467 | hypothetical protein                                    | -    |
| SAMCCGM7_c6479 | hypothetical protein                                    | -    |
| SAMCCGM7_c6488 | hypothetical protein                                    | -    |
| SAMCCGM7_c6508 | dehydrogenase                                           | -    |
| SAMCCGM7_c6513 | transposase                                             | -    |
| SAMCCGM7_c6514 | hypothetical protein                                    | -    |
| SAMCCGM7_c6518 | hypothetical protein                                    | -    |
| SAMCCGM7_c6535 | hypothetical protein                                    | -    |
| SAMCCGM7_c6564 | endonuclease V                                          | -    |
| SAMCCGM7_c6577 | hypothetical protein                                    | -    |
| SAMCCGM7_c6598 | hypothetical protein                                    | -    |
| SAMCCGM7_c6612 | hypothetical protein                                    | -    |
| SAMCCGM7_c6613 | ThiJ/PfpI family protein                                | -    |
| SAMCCGM7_c6614 | adenylate cyclase                                       | -    |
| SAMCCGM7_c6615 | adenylate cyclase                                       | -    |
| SAMCCGM7_c6617 | hypothetical protein                                    | -    |
| SAMCCGM7_c6618 | adenylate cyclase                                       | -    |
| SAMCCGM7_c6621 | transcriptional regulatory protein                      | -    |
| SAMCCGM7_c6622 | hypothetical protein                                    | -    |
| SAMCCGM7_c6623 | hypothetical protein                                    | -    |
| SAMCCGM7_c6642 | hypothetical protein                                    | -    |
| SAMCCGM7_c6643 | hypothetical protein                                    | -    |
| SAMCCGM7_c6644 | hypothetical protein                                    | -    |
| SAMCCGM7_c6645 | dipeptide transport ATP-binding protein DppF            | dppF |
| SAMCCGM7_c6646 | oligopeptide transport ATP-binding protein OppD         | -    |
| SAMCCGM7_c6647 | peptide ABC transporter permease                        | -    |
| SAMCCGM7_c6648 | dipeptide transport system permease protein DppB        | -    |
| SAMCCGM7_c6649 | dipeptide-binding ABC transporte                        | -    |
| SAMCCGM7_c6650 | fatty acid desaturase                                   | -    |
| SAMCCGM7_c6651 | hypothetical protein                                    | -    |
| SAMCCGM7_c6652 | hypothetical protein                                    | -    |
| SAMCCGM7_c6653 | aliphatic sulfonate ABC transporter ATP-binding protein | ssuC |
| SAMCCGM7_c6655 | sulfate and thiosulfate binding protein CysP            | -    |
| SAMCCGM7_c6656 | glycolate dehydrogenase, iron-sulfur subunit GlcF       | -    |
| SAMCCGM7_c6657 | hypothetical protein                                    | -    |
| SAMCCGM7_c6658 | transposase                                             | -    |
| SAMCCGM7_c6659 | hypothetical protein                                    | -    |
| SAMCCGM7_c6660 | hypothetical protein                                    | -    |
| SAMCCGM7_c6661 | hypothetical protein                                    | -    |
| SAMCCGM7_c6662 | hypothetical protein                                    | -    |
| SAMCCGM7_c6664 | NAD(P) transhydrogenase subunit beta                    | -    |
| SAMCCGM7_c6665 | succinylglutamate desuccinylase/aspartoacylase          | -    |
| SAMCCGM7_c6666 | hypothetical protein                                    | -    |
| SAMCCGM7_c6667 | hypothetical protein                                    | -    |
| SAMCCGM7_c6668 | NAD(P)H oxidoreductase                                  | -    |
| SAMCCGM7_c6669 | transposase                                             | -    |

|                |                                              |   |
|----------------|----------------------------------------------|---|
| SAMCCGM7_c6670 | electron transfer flavoprotein, beta subunit | - |
| SAMCCGM7_c6673 | D-3-phosphoglycerate dehydrogenase           | - |



Supplementary Table 4. Prediction of the genes of CCGM1 prophages

| Prophage 1 (Ph1) |        |        |             |     |                                                   |                                         |                                     |         |            |          |
|------------------|--------|--------|-------------|-----|---------------------------------------------------|-----------------------------------------|-------------------------------------|---------|------------|----------|
| Gene             | Start  | Stop   | Code. strd. | aa  | Predicted product                                 | Homologue (by function)                 | Best phage hit                      | E-value | Percentage |          |
|                  |        |        |             |     |                                                   |                                         |                                     |         | Identity   | Coverage |
| RLPCCGM1_c2006   | 775755 | 776486 | +           | 243 | autoinducer transcriptional regulator protein     |                                         |                                     |         |            |          |
| RLPCCGM1_c2007   | 776710 | 777375 | +           | 221 | autoinducer synthesis protein                     |                                         |                                     |         |            |          |
| RLPCCGM1_c2008   | 777372 | 777563 | +           | 63  | hypothetical protein                              |                                         |                                     |         |            |          |
| RLPCCGM1_c2009   | 777684 | 778052 | -           | 122 | two-component response regulator protein          |                                         |                                     |         |            |          |
| RLPCCGM1_c2011   | 778562 | 778867 | -           | 101 | hypothetical protein                              |                                         |                                     |         |            |          |
| RLPCCGM1_c2012   | 778869 | 779582 | -           | 237 | adenine specific DNA methyltransferase, D12 class | Gp27                                    | Burkholderia phage phiE125          | 7E-71   | 51         | 87       |
| RLPCCGM1_c2013   | 779819 | 781717 | -           | 632 | hypothetical protein                              | Uncharacterized protein                 | Rhizobium phage vB_RleS_L338C       | 0E+00   | 72         | 96       |
| RLPCCGM1_c2014   | 781721 | 782392 | -           | 223 | hypothetical protein                              |                                         |                                     |         |            |          |
| RLPCCGM1_c2015   | 782389 | 783405 | -           | 338 | hypothetical protein                              | Uncharacterized protein                 | Rhizobium phage RHEph06             | 5E-19   | 31         | 64       |
| RLPCCGM1_c2016   | 783405 | 784001 | -           | 198 | tail protein                                      | Protein gp48                            | Enterobacteria phage Mu             | 3E-10   | 27         | 96       |
| RLPCCGM1_c2017   | 784001 | 785140 | -           | 379 | phage FluMu protein gp47                          | Protein gp47                            | Enterobacteria phage Mu             | 1E-37   | 28         | 100      |
| RLPCCGM1_c2018   | 785142 | 785603 | -           | 153 | hypothetical protein                              |                                         |                                     |         |            |          |
| RLPCCGM1_c2019   | 785659 | 786171 | -           | 170 | Mu-like prophage protein gp45-like protein        | Sb19                                    | Salmonella phage ST64B              | 4E-11   | 34         | 59       |
| RLPCCGM1_c2020   | 786171 | 787370 | -           | 399 | Mu P family protein                               | Baseplate assembly protein              | Enterobacteria phage D108           | 3E-35   | 30         | 96       |
| RLPCCGM1_c2021   | 787367 | 788611 | -           | 414 | Mu-like prophage DNA circulation protein          | Putative uncharacterized protein        | Enterobacteria phage phiP27         | 2E-16   | 26         | 96       |
| RLPCCGM1_c2022   | 788611 | 791034 | -           | 807 | hypothetical protein                              | Gp18                                    | Burkholderia phage phiE255          | 3E-33   | 29         | 51       |
| RLPCCGM1_c2023   | 791048 | 791179 | -           | 43  | hypothetical protein                              |                                         |                                     |         |            |          |
| RLPCCGM1_c2024   | 791179 | 791661 | -           | 160 | hypothetical protein                              |                                         |                                     |         |            |          |
| RLPCCGM1_c2025   | 791658 | 792020 | -           | 120 | hypothetical protein                              |                                         |                                     |         |            |          |
| RLPCCGM1_c2026   | 792035 | 793522 | -           | 495 | Mu tail sheath family protein                     | Tail sheath protein                     | Enterobacteria phage D108           | 1E-44   | 27         | 100      |
| RLPCCGM1_c2027   | 793526 | 793831 | -           | 101 | hypothetical protein                              |                                         |                                     |         |            |          |
| RLPCCGM1_c2028   | 793835 | 794416 | -           | 193 | hypothetical protein                              |                                         |                                     |         |            |          |
| RLPCCGM1_c2029   | 794416 | 794850 | -           | 144 | hypothetical protein                              | Protein gp36                            | Enterobacteria phage Mu             | 2E-17   | 30         | 94       |
| RLPCCGM1_c2030   | 794930 | 795256 | -           | 108 | hypothetical protein                              |                                         |                                     |         |            |          |
| RLPCCGM1_c2031   | 795442 | 795879 | -           | 145 | hypothetical protein                              |                                         |                                     |         |            |          |
| RLPCCGM1_c2032   | 796002 | 796895 | -           | 297 | Mu-like prophage FluMu major head subunit         | Mu-like prophage major head subunit gpT | Pseudomonas phage JBD25             | 9E-88   | 42         | 99       |
| RLPCCGM1_c2033   | 796906 | 797301 | -           | 131 | hypothetical protein                              | Uncharacterized protein                 | Pseudomonas phage JBD25             | 3E-06   | 27         | 98       |
| RLPCCGM1_c2034   | 797303 | 798340 | -           | 345 | Mu-like prophage I protein-like protein           | Putative uncharacterized protein        | Pseudomonas phage F_HA0480sp/Pa1651 | 3E-23   | 29         | 100      |
| RLPCCGM1_c2035   | 798425 | 798937 | -           | 170 | phage virion morphogenesis protein                | Virion morphogenesis protein            | Rhodobacter phage RcapMu            | 5E-24   | 35         | 99       |
| RLPCCGM1_c2036   | 799048 | 800244 | -           | 398 | phage (Mu-like) virion morphogenesis protein      | Phage Mu protein F-like protein         | Pseudomonas phage JBD25             | 3E-65   | 44         | 57       |
| RLPCCGM1_c2037   | 800271 | 801869 | -           | 532 | Mu-like prophage FluMu protein gp29               | Portal protein                          | Pseudomonas phage PA1/KOR/2010      | 7E-62   | 33         | 79       |
| RLPCCGM1_c2038   | 801869 | 803521 | -           | 550 | Mu-like prophage FluMu protein gp28               | Gp2                                     | Burkholderia phage phiE255          | 2E-127  | 46         | 87       |
| RLPCCGM1_c2039   | 803518 | 804126 | -           | 202 | Mu-like prophage FluMu protein gp27               | Putative uncharacterized protein 27     | Enterobacteria phage D108           | 1E-08   | 27         | 98       |
| RLPCCGM1_c2040   | 804129 | 804446 | -           | 105 | phage protein                                     | Putative uncharacterized protein 26     | Enterobacteria phage D108           | 2E-09   | 32         | 92       |
| RLPCCGM1_c2041   | 804443 | 804790 | -           | 115 | hypothetical protein                              |                                         |                                     |         |            |          |

|                |        |        |   |     |                                           |                                         |                                    |        |    |    |
|----------------|--------|--------|---|-----|-------------------------------------------|-----------------------------------------|------------------------------------|--------|----|----|
| RLPCCGM1_c2042 | 805240 | 805602 | - | 120 | hypothetical protein                      |                                         |                                    |        |    |    |
| RLPCCGM1_c2043 | 805599 | 805805 | - | 68  | hypothetical protein                      |                                         |                                    |        |    |    |
| RLPCCGM1_c2044 | 805867 | 806349 | - | 160 | hypothetical protein                      | Endolysin                               | Pseudomonas phage vB_Pae-Kakheti25 | 1E-21  | 34 | 97 |
| RLPCCGM1_c2045 | 806697 | 807056 | - | 119 | hypothetical protein                      |                                         |                                    |        |    |    |
| RLPCCGM1_c2046 | 807334 | 807975 | - | 213 | protein gp16                              | Gp02                                    | Burkholderia phage BcepMu          | 2E-17  | 40 | 62 |
| RLPCCGM1_c2047 | 808092 | 808772 | + | 226 | hypothetical protein                      |                                         |                                    |        |    |    |
| RLPCCGM1_c2048 | 808796 | 808993 | - | 65  | hypothetical protein                      |                                         |                                    |        |    |    |
| RLPCCGM1_c2049 | 809000 | 809665 | - | 221 | hypothetical protein                      | Gp05                                    | Burkholderia phage BcepMu          | 2E-50  | 42 | 90 |
| RLPCCGM1_c2050 | 809679 | 809810 | + | 43  | hypothetical protein                      |                                         |                                    |        |    |    |
| RLPCCGM1_c2051 | 809864 | 810142 | - | 92  | hypothetical protein                      |                                         |                                    |        |    |    |
| RLPCCGM1_c2052 | 810139 | 810432 | - | 97  | hypothetical protein                      |                                         |                                    |        |    |    |
| RLPCCGM1_c2053 | 810429 | 811448 | - | 339 | bacteriophage DNA transposition protein B | DNA transposition protein B             | Enterobacteria phage D108          | 1E-33  | 29 | 85 |
| RLPCCGM1_c2054 | 811570 | 813402 | - | 610 | transposase                               | Transposase                             | Enterobacteria phage Mu            | 3E-103 | 36 | 94 |
| RLPCCGM1_c2055 | 813531 | 813989 | - | 152 | hypothetical protein                      | Conserved transposable prophage protein | Rhodobacter phage RcapMu           | 1E-07  | 34 | 75 |
| RLPCCGM1_c2056 | 813982 | 814833 | - | 283 | chromosome partitioning protein parB      | ParB nuclease                           | Rhodobacter phage RcapMu           | 9E-19  | 30 | 85 |

### Prophage 2 (Ph2)

| Gene           | Start | Stop  | Code strd. | aa   | Predicted product           | Homologue (by function)                         | Best phage hit                | E-value | Percentage |          |
|----------------|-------|-------|------------|------|-----------------------------|-------------------------------------------------|-------------------------------|---------|------------|----------|
|                |       |       |            |      |                             |                                                 |                               |         | Identity   | Coverage |
| RLPCCGM1_c1245 | 50    | 1114  | +          | 354  | glycosyl transferase family | GtrB                                            | Salmonella phage ST160        | 5E-08   | 31         | 33       |
| RLPCCGM1_c1246 | 1582  | 1929  | +          | 115  | hypothetical protein        | Putative SOS response-associated peptidase yoqW | Bacillus phage SPbeta         | 1E-17   | 36         | 45       |
| RLPCCGM1_c1247 | 2496  | 2801  | -          | 101  | hypothetical protein        |                                                 |                               |         |            |          |
| RLPCCGM1_c1248 | 2892  | 3197  | -          | 101  | hypothetical protein        |                                                 |                               |         |            |          |
| RLPCCGM1_c1249 | 3179  | 3634  | -          | 151  | hypothetical protein        |                                                 |                               |         |            |          |
| RLPCCGM1_c1250 | 3631  | 4422  | -          | 263  | phage endolysin             | Glycoside hydrolase, family 19                  | Flavobacterium phage 11b      | 5E-41   | 52         | 52       |
| RLPCCGM1_c1251 | 4456  | 5580  | -          | 374  | hypothetical protein        | Baseplate wedge initiator                       | Prochlorococcus phage P-HM1   | 3E-17   | 36         | 53       |
| RLPCCGM1_c1252 | 5587  | 6003  | -          | 138  | hypothetical protein        |                                                 |                               |         |            |          |
| RLPCCGM1_c1253 | 6017  | 6931  | -          | 304  | hypothetical protein        | Collagen triple helix repeat domain protein     | Synechococcus phage S-CRM01   | 3E-26   | 55         | 31       |
| RLPCCGM1_c1254 | 6935  | 7765  | -          | 276  | hypothetical protein        |                                                 |                               |         |            |          |
| RLPCCGM1_c1255 | 7765  | 8181  | -          | 138  | hypothetical protein        |                                                 |                               |         |            |          |
| RLPCCGM1_c1256 | 8181  | 8471  | -          | 96   | hypothetical protein        |                                                 |                               |         |            |          |
| RLPCCGM1_c1257 | 8440  | 9936  | -          | 498  | hypothetical protein        |                                                 |                               |         |            |          |
| RLPCCGM1_c1258 | 9940  | 10371 | -          | 143  | hypothetical protein        |                                                 |                               |         |            |          |
| RLPCCGM1_c1259 | 10378 | 13416 | -          | 1012 | hypothetical protein        | Tail tape measure protein                       | Synechococcus phage S-CBS1    | 5E-14   | 31         | 33       |
| RLPCCGM1_c1260 | 13905 | 14567 | -          | 220  | hypothetical protein        |                                                 |                               |         |            |          |
| RLPCCGM1_c1261 | 14564 | 14743 | -          | 59   | hypothetical protein        |                                                 |                               |         |            |          |
| RLPCCGM1_c1262 | 14749 | 15168 | -          | 139  | hypothetical protein        |                                                 |                               |         |            |          |
| RLPCCGM1_c1263 | 15289 | 15813 | -          | 174  | hypothetical protein        | Virion associated protein                       | Phage Sano                    | 7E-13   | 29         | 52       |
| RLPCCGM1_c1264 | 15858 | 16301 | -          | 147  | hypothetical protein        |                                                 |                               |         |            |          |
| RLPCCGM1_c1265 | 16294 | 16638 | -          | 114  | hypothetical protein        |                                                 |                               |         |            |          |
| RLPCCGM1_c1266 | 16613 | 17080 | -          | 155  | hypothetical protein        | Uncharacterized protein                         | Caulobacter phage CcrColossus | 2E-17   | 35         | 58       |

|                |       |       |   |     |                                     |                                                   |                                |        |    |    |
|----------------|-------|-------|---|-----|-------------------------------------|---------------------------------------------------|--------------------------------|--------|----|----|
| RLPCCGM1_c1267 | 17109 | 17402 | - | 97  | hypothetical protein                |                                                   |                                |        |    |    |
| RLPCCGM1_c1268 | 17399 | 18043 | - | 214 | SAM-dependent methyltransferase     | Putative FkbM-like methyltransferase              | Caulobacter phage CcrColossus  | 4E-18  | 33 | 66 |
| RLPCCGM1_c1269 | 18040 | 18840 | - | 266 | hypothetical protein                |                                                   |                                |        |    |    |
| RLPCCGM1_c1270 | 18828 | 19538 | - | 236 | hypothetical protein                | Putative nucleotide-diphospho-sugar transferase   | Caulobacter phage CcrColossus  | 5E-46  | 38 | 92 |
| RLPCCGM1_c1271 | 19535 | 20140 | - | 201 | hypothetical protein                | Putative alpha-2,3-sialyltransferase-like protein | Caulobacter phage CcrColossus  | 2E-22  | 33 | 97 |
| RLPCCGM1_c1272 | 20146 | 21159 | - | 337 | phage protein                       | Major capsid protein                              | Acidithiobacillus phage AcaML1 | 1E-34  | 29 | 97 |
| RLPCCGM1_c1273 | 21258 | 21632 | - | 124 | phage protein                       |                                                   |                                |        |    |    |
| RLPCCGM1_c1274 | 21688 | 22203 | - | 171 | hypothetical protein                |                                                   |                                |        |    |    |
| RLPCCGM1_c1275 | 22299 | 23210 | - | 303 | peptidase S49                       | Putative prohead protease                         | Erwinia phage phiEa21-4        | 6E-27  | 32 | 64 |
| RLPCCGM1_c1276 | 23200 | 24762 | - | 520 | phage portal protein, lambda family | Portal protein                                    | Acidithiobacillus phage AcaML1 | 3E-159 | 52 | 93 |
| RLPCCGM1_c1277 | 24765 | 24986 | - | 73  | hypothetical protein                |                                                   |                                |        |    |    |
| RLPCCGM1_c1278 | 24979 | 25494 | - | 171 | hypothetical protein                | Uncharacterized protein                           | Sinorhizobium phage phiM12     | 4E-41  | 67 | 51 |
| RLPCCGM1_c1279 | 25499 | 27649 | - | 716 | bacteriophage tail assembly protein | Terminus large subunit                            | Escherichia phage 1720a-02     | 9E-122 | 37 | 87 |
| RLPCCGM1_c1280 | 27649 | 28296 | - | 215 | hypothetical protein                |                                                   |                                |        |    |    |
| RLPCCGM1_c1281 | 28643 | 29326 | - | 227 | hypothetical protein                |                                                   |                                |        |    |    |
| RLPCCGM1_c1282 | 29316 | 30656 | - | 446 | hypothetical protein                | Primosomal protein I                              | Escherichia phage 1720a-02     | 4E-11  | 33 | 30 |
| RLPCCGM1_c1283 | 31451 | 31996 | + | 181 | hypothetical protein                |                                                   |                                |        |    |    |
| RLPCCGM1_c1284 | 32165 | 32413 | - | 82  | hypothetical protein                |                                                   |                                |        |    |    |
| RLPCCGM1_c1285 | 32410 | 32700 | - | 96  | hypothetical protein                |                                                   |                                |        |    |    |
| RLPCCGM1_c1286 | 32697 | 32894 | - | 65  | hypothetical protein                |                                                   |                                |        |    |    |
| RLPCCGM1_c1287 | 32891 | 33166 | - | 91  | hypothetical protein                |                                                   |                                |        |    |    |
| RLPCCGM1_c1288 | 33156 | 33422 | - | 88  | hypothetical protein                |                                                   |                                |        |    |    |
| RLPCCGM1_c1289 | 33436 | 33990 | - | 184 | hypothetical protein                |                                                   |                                |        |    |    |
| RLPCCGM1_c1290 | 33990 | 35540 | - | 516 | hypothetical protein                | p096                                              | Rhizobium phage 16-3           | 7E-34  | 40 | 39 |
| RLPCCGM1_c1291 | 35537 | 35749 | - | 70  | hypothetical protein                |                                                   |                                |        |    |    |
| RLPCCGM1_c1292 | 35746 | 36195 | - | 149 | hypothetical protein                |                                                   |                                |        |    |    |
| RLPCCGM1_c1293 | 36266 | 36469 | - | 67  | hypothetical protein                |                                                   |                                |        |    |    |
| RLPCCGM1_c1294 | 36469 | 36918 | - | 149 | hypothetical protein                |                                                   |                                |        |    |    |
| RLPCCGM1_c1295 | 37327 | 37578 | - | 83  | hypothetical protein                |                                                   |                                |        |    |    |
| RLPCCGM1_c1296 | 37667 | 38347 | + | 226 | phage repressor                     | Repressor protein C                               | Rhizobium phage 16-3           | 2E-20  | 35 | 59 |

### Prophage 3 (Ph3)

| Gene           | Start  | Stop   | Code strd. | aa  | Predicted product                   | Homologue (by function)          | Best phage hit        | E-value | Percentage |          |
|----------------|--------|--------|------------|-----|-------------------------------------|----------------------------------|-----------------------|---------|------------|----------|
|                |        |        |            |     |                                     |                                  |                       |         | Identity   | Coverage |
| RLPCCGM1_c0840 | 389092 | 389457 | +          | 121 | phage protein                       | Putative terminase small subunit | Pseudomonas phage H66 | 5E-24   | 42         | 64       |
| RLPCCGM1_c0841 | 389423 | 390994 | +          | 523 | terminase large subunit protein     | Putative terminase large subunit | Erwinia phagep14      | 4E-120  | 40         | 91       |
| RLPCCGM1_c0842 | 390994 | 393093 | +          | 699 | methyl-accepting chemotaxis protein | Putative portal protein          | Brucella phage Tb     | 7E-115  | 33         | 89       |
| RLPCCGM1_c0843 | 393113 | 393424 | +          | 103 | hypothetical protein                |                                  |                       |         |            |          |

|                |        |        |   |     |                                         |                                 |                            |        |    |     |
|----------------|--------|--------|---|-----|-----------------------------------------|---------------------------------|----------------------------|--------|----|-----|
| RLPCCGM1_c0844 | 393460 | 394551 | + | 363 | hypothetical protein                    | P47                             | Myxococcus phage Mx8       | 1E-07  | 28 | 77  |
| RLPCCGM1_c0845 | 394567 | 395541 | + | 324 | major virion structural protein         | Major virion structural protein | Myxococcus phage Mx8       | 1E-110 | 52 | 100 |
| RLPCCGM1_c0846 | 395563 | 396348 | + | 261 | hypothetical protein                    |                                 |                            |        |    |     |
| RLPCCGM1_c0847 | 396417 | 396983 | + | 188 | phage protein                           | P50                             | Myxococcus phage Mx8       | 2E-23  | 34 | 74  |
| RLPCCGM1_c0848 | 396999 | 397697 | + | 232 | hypothetical protein                    | P51                             | Myxococcus phage Mx8       | 2E-25  | 35 | 89  |
| RLPCCGM1_c0849 | 397694 | 399517 | + | 607 | hypothetical protein                    | Structural protein              | Brucella phage Pr          | 7E-62  | 29 | 95  |
| RLPCCGM1_c0850 | 399514 | 399921 | + | 135 | hypothetical protein                    | Acetyltransferase               | Burkholderia phage DC1     | 3E-12  | 34 | 90  |
| RLPCCGM1_c0851 | 399968 | 400711 | + | 247 | hypothetical protein                    | Structural protein              | Brucella phage F1          | 1E-36  | 37 | 69  |
| RLPCCGM1_c0852 | 400711 | 403077 | + | 788 | flagellar protein FlgJ                  | Virion structural protein       | Myxococcus phage Mx8       | 3E-18  | 34 | 47  |
| RLPCCGM1_c0853 | 403171 | 405183 | + | 670 | hypothetical protein                    |                                 |                            |        |    |     |
| RLPCCGM1_c0854 | 405426 | 406781 | + | 451 | hypothetical protein                    | Uncharacterized protein         | Rhizobium phage RHEph06    | 5E-102 | 56 | 60  |
| RLPCCGM1_c0855 | 406781 | 406975 | + | 64  | hypothetical protein                    |                                 |                            |        |    |     |
| RLPCCGM1_c0856 | 406988 | 407137 | + | 49  | hypothetical protein                    | Uncharacterized protein         | Sinorhizobium phage phiM12 | 3E-10  | 57 | 94  |
| RLPCCGM1_c0857 | 407134 | 407562 | + | 142 | hypothetical protein                    |                                 |                            |        |    |     |
| RLPCCGM1_c0858 | 407818 | 408405 | + | 195 | phage antirepressor protein             | Putative antirepressor          | Enterobacteria phage CUS-3 | 2E-15  | 32 | 59  |
| RLPCCGM1_c0859 | 408527 | 408691 | + | 54  | hypothetical protein                    |                                 |                            |        |    |     |
| RLPCCGM1_c0860 | 408681 | 409145 | + | 154 | lysozyme protein                        | Lysozyme                        | Xanthomonas phage Xop411   | 2E-36  | 44 | 83  |
| RLPCCGM1_c0861 | 409145 | 409507 | + | 120 | hypothetical protein                    |                                 |                            |        |    |     |
| RLPCCGM1_c0862 | 409464 | 409739 | + | 91  | hypothetical protein                    |                                 |                            |        |    |     |
| RLPCCGM1_c0863 | 409736 | 411328 | + | 530 | hypothetical protein                    | Uncharacterized protein         | Rhizobium phage RHEph01    | 1E-96  | 39 | 98  |
| RLPCCGM1_c0864 | 411525 | 411764 | + | 79  | transmembrane protein                   |                                 |                            |        |    |     |
| RLPCCGM1_c0865 | 411932 | 412249 | - | 105 | succinoglycan biosynthesis protein exoI |                                 |                            |        |    |     |
| RLPCCGM1_c0866 | 415553 | 415762 | + | 69  | hypothetical protein                    |                                 |                            |        |    |     |
| RLPCCGM1_c0867 | 416077 | 416367 | - | 96  | hypothetical protein                    |                                 |                            |        |    |     |
| RLPCCGM1_c0868 | 416395 | 416670 | - | 91  | hypothetical protein                    |                                 |                            |        |    |     |
| RLPCCGM1_c0869 | 418376 | 419665 | - | 429 | phage integrase family protein          | Putative integrase              | Salmonella phage SPN3UB    | 4E-29  | 29 | 92  |

Supplementary Table 5. Presence or absence of genes related to nitrogen fixation and nodule development in rhizobia and *K. pneumoniae*.

*nif*

|                                                  | A | B | H | D | K | E | N | X | Q | R | S | U | W | Z | V | J | T | M | L | F | Y | <i>bacA</i> |  |
|--------------------------------------------------|---|---|---|---|---|---|---|---|---|---|---|---|---|---|---|---|---|---|---|---|---|-------------|--|
| <i>Klebsiella pneumoniae</i> Kp342               |   |   |   |   |   |   |   |   |   |   |   |   |   |   |   |   |   |   |   |   |   |             |  |
| <i>Bradyrhizobium</i> sp. ORS278                 |   |   | 2 |   |   |   |   |   |   |   | 2 | 2 |   | 2 |   |   |   |   |   |   |   |             |  |
| <i>Bradyrhizobium</i> sp. BTAi1                  |   |   | 2 |   |   |   |   |   |   |   | 2 | 3 |   |   |   |   |   |   |   |   |   |             |  |
| <i>Azorhizobium caulinodans</i> ORS571           |   |   | 2 |   |   |   |   |   |   |   |   | 3 |   |   |   |   |   |   |   |   |   |             |  |
| <i>Rhizobium etli</i> CFN42                      |   |   | 3 | 2 | 2 |   |   |   |   |   | 2 | 2 |   |   |   |   |   |   |   |   |   |             |  |
| <i>Rhizobium leguminosarum</i> phaseoli CCGM1    |   |   | 2 | 2 |   |   |   |   |   |   | 2 | 2 |   |   |   |   |   |   |   |   |   |             |  |
| <i>Rhizobium leguminosarum</i> phaseoli CIAT652  |   |   | 3 | 3 | 2 |   |   |   |   |   | 2 | 2 |   |   |   |   |   |   |   |   |   |             |  |
| <i>Rhizobium leguminosarum</i> phaseoli CNPAF512 |   |   |   |   |   |   |   |   | ? |   | 2 | 2 | ? |   |   |   |   |   |   |   |   |             |  |
| <i>Rhizobium leguminosarum</i> viciae 3841       |   |   |   |   |   |   |   |   |   |   |   |   |   |   |   |   |   |   |   |   |   |             |  |
| <i>Sinorhizobium americanum</i> CCGM7            |   |   |   |   |   |   |   |   |   | ? | 2 | 2 |   |   |   |   |   |   |   |   |   |             |  |
| <i>Sinorhizobium fredii</i> NGR234               |   |   | 2 | 2 | 2 |   |   |   |   |   |   | 2 |   |   |   |   |   |   |   |   |   |             |  |
| <i>Sinorhizobium fredii</i> USDA257              |   |   | 2 | 2 | 2 |   |   |   |   | ? |   |   |   |   |   |   |   |   |   |   |   |             |  |
| <i>Sinorhizobium meliloti</i> 1021               |   |   |   |   |   |   |   |   |   |   |   |   |   |   |   |   |   |   |   |   |   |             |  |

*fix*

|                                                  | A | B | C | X | G | H | I | S | N | O | Q | P | L | J | T | K | U | R | M | F |  |
|--------------------------------------------------|---|---|---|---|---|---|---|---|---|---|---|---|---|---|---|---|---|---|---|---|--|
| <i>Klebsiella pneumoniae</i> Kp342               |   |   |   |   |   |   |   |   |   |   |   |   |   |   |   |   |   |   |   |   |  |
| <i>Bradyrhizobium</i> sp. ORS278                 |   |   |   |   | 4 |   |   |   |   |   |   |   |   |   |   |   |   | 2 |   |   |  |
| <i>Bradyrhizobium</i> sp. BTAi1                  |   |   |   | 3 |   |   |   | ? |   |   |   |   |   |   |   | 4 |   | 2 |   |   |  |
| <i>Azorhizobium caulinodans</i> ORS571           |   |   |   |   |   | ? | ? |   |   |   |   |   |   |   |   |   |   |   |   |   |  |
| <i>Rhizobium etli</i> CFN42                      |   |   |   |   | 2 |   | 2 | 2 | 2 | 2 | 2 | 2 |   | * |   | 2 |   |   |   |   |  |
| <i>Rhizobium leguminosarum</i> phaseoli CCGM1    |   |   | ? |   |   |   |   |   |   |   |   |   |   |   |   |   |   |   |   |   |  |
| <i>Rhizobium leguminosarum</i> phaseoli CIAT652  |   |   |   |   |   |   |   |   |   |   |   |   |   |   |   | 2 |   |   |   |   |  |
| <i>Rhizobium leguminosarum</i> phaseoli CNPAF512 |   |   |   |   |   |   |   |   |   |   |   |   |   |   |   | 2 |   |   |   |   |  |
| <i>Rhizobium leguminosarum</i> viciae 3841       |   |   |   |   | 2 | 2 | 3 | 3 | 3 | 3 | 3 | 3 |   |   |   |   |   |   |   |   |  |
| <i>Sinorhizobium americanum</i> CCGM7            |   |   |   |   |   |   |   |   | 2 |   |   |   |   |   |   | 2 |   |   |   |   |  |
| <i>Sinorhizobium fredii</i> NGR234               |   |   |   |   |   |   | 2 | 2 | 2 | 2 | 2 | 2 | ? | ? | ? |   |   |   |   |   |  |
| <i>Sinorhizobium fredii</i> USDA257              |   |   |   |   |   |   |   |   | 3 |   |   |   |   |   |   | 2 |   |   |   |   |  |
| <i>Sinorhizobium meliloti</i> 1021               |   |   |   |   |   | 2 | 2 | 3 | 3 | 3 | 3 | 2 |   | 3 | 3 |   |   |   |   |   |  |
